# Supplementary material for: Towards machine learning discovery of dual antibacterial drug–nanoparticle systems
Source: Royal Society of Chemistry journal article supplement (doi:10.1039/d1nr04178a), 2021-01-01
Supplement: d1nr04178a3.xlsx [file d1nr04178a3.xlsx]

## Sheet: CASES
n	Drugs	CMPD_CHEMBLID	cd1 = Specia	cd2 = strain	MIC(μg/ml)	cutoff	f(vij, vnj)obs	f(vij, vnj)pred	p(vij, vnj)obs	f(vij, vnj)calc	LogP Note	D1=ALOGP	Sh(LOGP)	<Sh(LOGP)>	DSh(LOGP)cd1,cd2	NP	NP Type	Shape Observed	Shape used	Size note	APSn(nm)	AMVn	Apn	t(h)	Sh1(AMVn)cn	Sh1(APn)cn	Sh1(APSn)cn	Sh6(t(h)n)	<Sh1(AMVn)cn>	<Sh1(APn)cn>	<Sh1(APSn)cn>	<Sh6(t(h)n)>	DSh1(AMVn)cn	DSh1(APn)cn	DSh1(APSn)cn	DSh6(t(h)n)	COAT_KEY	cc1 = Coating mult.	cc2 = Poly.	PSA1c	PSA2c	Sh(PSA1c)	Sh(PSA2c)	<Sh(PSA1c)>	<Sh(PSA1c)>	DSh2(PSA1c+PSA1c)	Note on cd1,cd2 used	Ref
1	Meropenem	CHEMBL127	Pseudomonas aeruginosa	MDR	25.1969	50	1	1	0.99	76.0831	ChEMBL	-0.31	0.150525	0.150429	9.60158e-05	CuZn	Metal	Spherical			21	8.15	6.55	24	0.150242	0.150296	0.149803	0.1497	0.14296	0.15043	0.150311	0.150439	0.00728135	-0.000134585	-0.000507304	-0.000738822	TEG	Single	Polymer	58.92	0	0.148459	0.150515	0.150532	0.150515	-0.00207241		Eleftheriadou, I., Giannousi, K., Protonotariou, E., Skoura, L., Arsenakis, M., Dendrinou-Samara, C., & Sivropoulou, A. (2021). Cocktail of CuO, ZnO, or CuZn Nanoparticles and Antibiotics for Combating Multidrug-Resistant Pseudomonas aeruginosa via Efflux Pump Inhibition. ACS Applied Nano Materials.
2	Ciprofloxacin	CHEMBL8	Pseudomonas aeruginosa	MDR	3.18408	50	1	1	0.99	76.1683	ChEMBL	1.58	0.150462	0.150429	3.29832e-05	CuZn	Metal	Spherical			21	8.15	6.55	24	0.150242	0.150296	0.149803	0.1497	0.14296	0.15043	0.150311	0.150439	0.00728135	-0.000134585	-0.000507304	-0.000738822	TEG	Single	Polymer	58.92	0	0.148459	0.150515	0.150532	0.150515	-0.00207241		Eleftheriadou, I., Giannousi, K., Protonotariou, E., Skoura, L., Arsenakis, M., Dendrinou-Samara, C., & Sivropoulou, A. (2021). Cocktail of CuO, ZnO, or CuZn Nanoparticles and Antibiotics for Combating Multidrug-Resistant Pseudomonas aeruginosa via Efflux Pump Inhibition. ACS Applied Nano Materials.
3	Meropenen	CHEMBL127	Pseudomonas aeruginosa	MDR	13.9021	50	1	1	0.99	76.0794	ChEMBL	-0.31	0.150525	0.150429	9.60158e-05	CuO	Metal Oxide	Spherical			15	10.55	3.7465	24	0.150161	0.15039	0.150009	0.1497	0.14296	0.15043	0.150311	0.150439	0.00720018	-4.04015e-05	-0.000301588	-0.000738822	PEG	Single	Polymer	49.69	0	0.148793	0.150515	0.150532	0.150515	-0.00173831		Eleftheriadou, I., Giannousi, K., Protonotariou, E., Skoura, L., Arsenakis, M., Dendrinou-Samara, C., & Sivropoulou, A. (2021). Cocktail of CuO, ZnO, or CuZn Nanoparticles and Antibiotics for Combating Multidrug-Resistant Pseudomonas aeruginosa via Efflux Pump Inhibition. ACS Applied Nano Materials.
4	Ciprofloxacin	CHEMBL8	Pseudomonas aeruginosa	MDR	4.75248	50	1	1	0.99	76.1646	ChEMBL	1.58	0.150462	0.150429	3.29832e-05	CuO	Metal Oxide	Spherical			15	10.55	3.7465	24	0.150161	0.15039	0.150009	0.1497	0.14296	0.15043	0.150311	0.150439	0.00720018	-4.04015e-05	-0.000301588	-0.000738822	PEG	Single	Polymer	49.69	0	0.148793	0.150515	0.150532	0.150515	-0.00173831		Eleftheriadou, I., Giannousi, K., Protonotariou, E., Skoura, L., Arsenakis, M., Dendrinou-Samara, C., & Sivropoulou, A. (2021). Cocktail of CuO, ZnO, or CuZn Nanoparticles and Antibiotics for Combating Multidrug-Resistant Pseudomonas aeruginosa via Efflux Pump Inhibition. ACS Applied Nano Materials.
5	Meropenen	CHEMBL127	Pseudomonas aeruginosa	MDR	34.7287	50	1	1	0.99	75.9799	ChEMBL	-0.31	0.150525	0.150429	9.60158e-05	ZnO	Metal Oxide	Spherical			35	11.6	3.5965	24	0.150125	0.150395	0.149316	0.1497	0.14296	0.15043	0.150311	0.150439	0.00716457	-3.53742e-05	-0.00099476	-0.000738822	PEG	Single	Polymer	49.69	0	0.148793	0.150515	0.150532	0.150515	-0.00173831		Eleftheriadou, I., Giannousi, K., Protonotariou, E., Skoura, L., Arsenakis, M., Dendrinou-Samara, C., & Sivropoulou, A. (2021). Cocktail of CuO, ZnO, or CuZn Nanoparticles and Antibiotics for Combating Multidrug-Resistant Pseudomonas aeruginosa via Efflux Pump Inhibition. ACS Applied Nano Materials.
6	Ciprofloxacin	CHEMBL8	Pseudomonas aeruginosa	MDR	3.9604	50	1	1	0.99	76.0651	ChEMBL	1.58	0.150462	0.150429	3.29832e-05	ZnO	Metal Oxide	Spherical			35	11.6	3.5965	24	0.150125	0.150395	0.149316	0.1497	0.14296	0.15043	0.150311	0.150439	0.00716457	-3.53742e-05	-0.00099476	-0.000738822	PEG	Single	Polymer	49.69	0	0.148793	0.150515	0.150532	0.150515	-0.00173831		Eleftheriadou, I., Giannousi, K., Protonotariou, E., Skoura, L., Arsenakis, M., Dendrinou-Samara, C., & Sivropoulou, A. (2021). Cocktail of CuO, ZnO, or CuZn Nanoparticles and Antibiotics for Combating Multidrug-Resistant Pseudomonas aeruginosa via Efflux Pump Inhibition. ACS Applied Nano Materials.
7	Tobramycin	CHEMBL1747	Pseudomonas aeruginosa	ATCCi27853	0.22	50	1	1	0.99	76.0499	ChEMBL	-6.3	0.150724	0.150512	0.000212115	Fe3O4	Metal Oxide	iron-oxide (magnetite)		NP naked	16	44.5288	4.05314	24	0.148978	0.15038	0.149975	0.1497	0.143772	0.150435	0.150297	0.150159	0.00520583	-5.52151e-05	-0.000322262	-0.000459444	PEG/Alg	Double	Polymer	49.69	192.44	0.148793	0.143155	0.148793	0.126944	0.0162107		Armijo, L. M., Wawrzyniec, S. J., Kopciuch, M., Brandt, Y. I., Rivera, A. C., Withers, N. J., ... & Osiński, M. (2020). Antibacterial activity of iron oxide, iron nitride, and tobramycin conjugated nanoparticles against Pseudomonas aeruginosa biofilms. Journal of nanobiotechnology, 18(1), 1-27.
8	Tobramycin	CHEMBL1747	Pseudomonas aeruginosa	ATCCi27853	0.22	50	1	1	0.99	75.0295	ChEMBL	-6.3	0.150724	0.150512	0.000212115	Fe3O4	Metal Oxide	iron-oxide (magnetite)		NP coated	230	44.5288	4.05314	24	0.148978	0.15038	0.141514	0.1497	0.143772	0.150435	0.150297	0.150159	0.00520583	-5.52151e-05	-0.0087833	-0.000459444	PEG/Alg	Double	Polymer	49.69	192.44	0.148793	0.143155	0.148793	0.126944	0.0162107		Armijo, L. M., Wawrzyniec, S. J., Kopciuch, M., Brandt, Y. I., Rivera, A. C., Withers, N. J., ... & Osiński, M. (2020). Antibacterial activity of iron oxide, iron nitride, and tobramycin conjugated nanoparticles against Pseudomonas aeruginosa biofilms. Journal of nanobiotechnology, 18(1), 1-27.
9	Tobramycin	CHEMBL1747	Pseudomonas aeruginosa	ATCCi27853	0.22	50	1	1	0.99	75.0188	ChEMBL	-6.3	0.150724	0.150512	0.000212115	Fe3O4	Metal Oxide	iron-oxide (magnetite)		DADNP	232	44.5288	4.05314	24	0.148978	0.15038	0.141425	0.1497	0.143772	0.150435	0.150297	0.150159	0.00520583	-5.52151e-05	-0.00887238	-0.000459444	PEG/Alg	Double	Polymer	49.69	192.44	0.148793	0.143155	0.148793	0.126944	0.0162107		Armijo, L. M., Wawrzyniec, S. J., Kopciuch, M., Brandt, Y. I., Rivera, A. C., Withers, N. J., ... & Osiński, M. (2020). Antibacterial activity of iron oxide, iron nitride, and tobramycin conjugated nanoparticles against Pseudomonas aeruginosa biofilms. Journal of nanobiotechnology, 18(1), 1-27.
10	Ofloxacin	CHEMBL4	Staphylococcus aureus	MRSA	25	50	1	1	0.99	74.0105	ChEMBL	1.54	0.150464	0.150471	-7.71662e-06	MoS2		nanoflakes	Spherical	150-200 nm avg	175	31.6344	6.18	24	0.149434	0.150308	0.143896	0.1497	0.144035	0.150436	0.150293	0.150101	0.0053989	-0.00012813	-0.00639739	-0.000401112	Ch	Single	Polymer	808	0	0.110733	0.150515	0.150532	0.150515	-0.0397982		Huang, Y., Gao, Q., Li, X., Gao, Y., Han, H., Jin, Q., ... & Ji, J. (2020). Ofloxacin loaded MoS 2 nanoflakes for synergistic mild-temperature photothermal/antibiotic therapy with reduced drug resistance of bacteria. Nano Research, 13, 2340-2350.
11	Ofloxacin	CHEMBL4	Staphylococcus aureus	MRSA	25	50	1	1	0.99	74.0105	ChEMBL	1.54	0.150464	0.150471	-7.71662e-06	MoS2		nanoflakes	Acicular	150-200 nm avg	175	31.6344	6.18	24	0.149434	0.150308	0.143896	0.1497	0.144035	0.150436	0.150293	0.150101	0.0053989	-0.00012813	-0.00639739	-0.000401112	Ch	Single	Polymer	808	0	0.110733	0.150515	0.150532	0.150515	-0.0397982		Huang, Y., Gao, Q., Li, X., Gao, Y., Han, H., Jin, Q., ... & Ji, J. (2020). Ofloxacin loaded MoS 2 nanoflakes for synergistic mild-temperature photothermal/antibiotic therapy with reduced drug resistance of bacteria. Nano Research, 13, 2340-2350.
12	Vancomycin	CHEMBL262777	Enterococcus faecium	n.d.	4	50	1	1	0.99	76.9046	DrugBank, AlogPS	1.11	0.150478	0.150446	3.24102e-05	Au	Metal	N/A			5	10.2	6.1	12	0.150172	0.150311	0.150348	0.150111	0.14296	0.15043	0.150311	0.150444	0.00721204	-0.000119439	3.69784e-05	-0.00033249	-	None	None	0	0	0.150515	0.150515	0.150515	0.150515	0		Gu, H., Ho, P. L., Tong, E., Wang, L., & Xu, B. (2003). Presenting vancomycin on nanoparticles to enhance antimicrobial activities. Nano letters, 3(9), 1261-1263.
13	Vancomycin	CHEMBL262777	Escherichia coli	n.d.	8	50	1	1	0.99	75.9126	DrugBank, AlogPS	1.11	0.150478	0.150343	0.000135283	Au	Metal	N/A			5	10.2	6.1	12	0.150172	0.150311	0.150348	0.150111	0.147403	0.150425	0.15039	0.149731	0.00276929	-0.000114317	-4.22437e-05	0.000380275	-	None	None	0	0	0.150515	0.150515	0.150515	0.150515	0		Gu, H., Ho, P. L., Tong, E., Wang, L., & Xu, B. (2003). Presenting vancomycin on nanoparticles to enhance antimicrobial activities. Nano letters, 3(9), 1261-1263.
14	Vancomycin	CHEMBL262777	Staphylococcus aureus	n.d.	0.05	50	1	1	0.99	76.2568	DrugBank, AlogPS	1.11	0.150478	0.150471	6.64022e-06	Ag	Metal	Spherical		16-25 nm avg	20.5	10.3	7.9	24	0.150169	0.15025	0.149821	0.1497	0.144035	0.150436	0.150293	0.150101	0.00613373	-0.000186089	-0.000472249	-0.000401112	TGA	Single	Polymer	37.3	0	0.149235	0.150515	0.150532	0.150515	-0.0012968		Esmaeillou, M., Zarrini, G., & Rezaee, M. A. (2017). Vancomycin capped with silver nanoparticles as an antibacterial agent against multi-drug resistance bacteria. Advanced pharmaceutical bulletin, 7(3), 479.
15	Vancomycin	CHEMBL262777	Enterococcus faecalis	VRE	0.1	50	1	1	0.99	76.4421	DrugBank, AlogPS	1.11	0.150478	0.150453	2.50668e-05	Ag	Metal	Spherical		16-25 nm avg	20.5	10.3	7.9	24	0.150169	0.15025	0.149821	0.1497	0.146615	0.150451	0.15025	0.149243	0.00355394	-0.000200487	-0.000429436	0.000456936	TGA	Single	Polymer	37.3	0	0.149235	0.150515	0.150532	0.150515	-0.0012968		Esmaeillou, M., Zarrini, G., & Rezaee, M. A. (2017). Vancomycin capped with silver nanoparticles as an antibacterial agent against multi-drug resistance bacteria. Advanced pharmaceutical bulletin, 7(3), 479.
16	Vancomycin	CHEMBL262777	Staphylococcus epidermidis	MRSE	0.02	50	1	1	0.99	76.5198	DrugBank, AlogPS	1.11	0.150478	0.150551	-7.32966e-05	Ag	Metal	Spherical		16-25 nm avg	20.5	10.3	7.9	24	0.150169	0.15025	0.149821	0.1497	0.146615	0.150451	0.15025	0.149278	0.00355394	-0.000200487	-0.000429436	0.000421629	TGA	Single	Polymer	37.3	0	0.149235	0.150515	0.150532	0.150515	-0.0012968		Esmaeillou, M., Zarrini, G., & Rezaee, M. A. (2017). Vancomycin capped with silver nanoparticles as an antibacterial agent against multi-drug resistance bacteria. Advanced pharmaceutical bulletin, 7(3), 479.
17	Daptomycin	CHEMBL387675	Staphylococcus aureus	n.d.	2	50	1	1	0.99	76.1309	DrugBank, AlogPS	1.11	0.150478	0.150471	6.64022e-06	Au	Metal	N/A			50	10.2	6.1	24	0.150172	0.150311	0.148782	0.1497	0.144035	0.150436	0.150293	0.150101	0.00613712	-0.000125438	-0.00151066	-0.000401112	PDA	Single	Polymer	37.3	0	0.149235	0.150515	0.150532	0.150515	-0.0012968		Meeker, D. G., Jenkins, S. V., Miller, E. K., Beenken, K. E., Loughran, A. J., Powless, A., ... & Chen, J. (2016). Synergistic photothermal and antibiotic killing of biofilm-associated Staphylococcus aureus using targeted antibiotic-loaded gold nanoconstructs. ACS infectious diseases, 2(4), 241-250.
18	Vancomycin	CHEMBL262777	Staphylococcus epidermitis	ATCC 12228	0.61	50	1	1	0.99	75.0128	DrugBank, AlogPS	1.11	0.150478	0.150551	6.64022e-06	Mn2Fe2O4	Metal Oxide	Spherical			25	54.4973	4.8315	24	0.14862	0.150353	0.149665	0.1497	0.14296	0.15043	0.150311	0.150444	0.00565963	-7.68017e-05	-0.000645516	-0.00074392	PEG/Ch	Double	Polymer	49.69	808	0.148793	0.110733	0.148793	0.126944	-0.0162107		Esmaeili, A., & Ghobadianpour, S. (2016). Vancomycin loaded superparamagnetic MnFe2O4 nanoparticles coated with PEGylated chitosan to enhance antibacterial activity. International journal of pharmaceutics, 501(1-2), 326-330.
19	Vancomycin	CHEMBL262777	Staphylococcus aureus	ATCC 25923	0.78	50	1	1	0.99	74.4723	DrugBank, AlogPS	1.11	0.150478	0.150471	3.29711e-05	Mn2Fe2O4	Metal Oxide	Spherical			25	54.4973	4.8315	24	0.14862	0.150353	0.149665	0.1497	0.146987	0.15045	0.150259	0.149636	0.00163266	-9.70499e-05	-0.000593854	6.37161e-05	PEG/Ch	Double	Polymer	49.69	808	0.148793	0.110733	0.148793	0.126944	-0.0162107		Esmaeili, A., & Ghobadianpour, S. (2016). Vancomycin loaded superparamagnetic MnFe2O4 nanoparticles coated with PEGylated chitosan to enhance antibacterial activity. International journal of pharmaceutics, 501(1-2), 326-330.
20	Vancomycin	CHEMBL262777	Bacillus subtilis	ATCC 1720	0.78	50	1	1	0.99	73.2219	DrugBank, AlogPS	1.11	0.150478	0.150445	3.29711e-05	Mn2Fe2O4	Metal Oxide	Spherical			25	54.4973	4.8315	24	0.14862	0.150353	0.149665	0.1497	0.147453	0.15045	0.15027	0.150304	0.00116733	-9.68643e-05	-0.000605091	-0.00060442	PEG/Ch	Double	Polymer	49.69	808	0.148793	0.110733	0.148793	0.126944	-0.0162107		Esmaeili, A., & Ghobadianpour, S. (2016). Vancomycin loaded superparamagnetic MnFe2O4 nanoparticles coated with PEGylated chitosan to enhance antibacterial activity. International journal of pharmaceutics, 501(1-2), 326-330.
21	Vancomycin	CHEMBL262777	Staphylococcus aureus	ATCC 33591 MRSA	0.98	50	1	1	0.99	75.0773	DrugBank, AlogPS	1.11	0.150478	0.150471	6.64022e-06	Mn2Fe2O4	Metal Oxide	Spherical			25	54.4973	4.8315	24	0.14862	0.150353	0.149665	0.1497	0.144035	0.150436	0.150293	0.150101	0.00458472	-8.28007e-05	-0.000627677	-0.000401112	PEG/Ch	Double	Polymer	49.69	808	0.148793	0.110733	0.148793	0.126944	-0.0162107		Esmaeili, A., & Ghobadianpour, S. (2016). Vancomycin loaded superparamagnetic MnFe2O4 nanoparticles coated with PEGylated chitosan to enhance antibacterial activity. International journal of pharmaceutics, 501(1-2), 326-330.
22	Vancomycin	CHEMBL262777	Escherichia coli	ATCC 1399	39.06	50	1	1	0.99	73.6266	DrugBank, AlogPS	1.11	0.150478	0.150615	-0.000136967	Mn2Fe2O4	Metal Oxide	Spherical			25	54.4973	4.8315	24	0.14862	0.150353	0.149665	0.1497	0.147094	0.15045	0.150262	0.150294	0.0015263	-9.70075e-05	-0.000596423	-0.000594202	PEG/Ch	Double	Polymer	49.69	808	0.148793	0.110733	0.148793	0.126944	-0.0162107		Esmaeili, A., & Ghobadianpour, S. (2016). Vancomycin loaded superparamagnetic MnFe2O4 nanoparticles coated with PEGylated chitosan to enhance antibacterial activity. International journal of pharmaceutics, 501(1-2), 326-330.
23	Tetracycline	CHEMBL1440	Escherichia coli	K12 ATCC 29425	6	50	1	1	0.99	75.6332	ChEMBL	-0.21	0.150522	0.150438	8.38307e-05	Au	Metal	quasi-spherical			25	10.2	6.1	20	0.150172	0.150311	0.149665	0.149838	0.147034	0.15045	0.15026	0.149743	0.00313853	-0.000139668	-0.000594978	9.49778e-05	-	None	None	0	0	0.150515	0.150515	0.150515	0.150515	0		Djafari, J., Marinho, C., Santos, T., Igrejas, G., Torres, C., Capelo, J. L., ... & Fernández‐Lodeiro, J. (2016). New Synthesis of Gold‐and Silver‐Based Nano‐Tetracycline Composites. ChemistryOpen, 5(3), 206.
24	Tetracycline	CHEMBL1440	Staphylococcus aureus	ATCC 25923	16	50	1	1	0.99	75.8654	ChEMBL	-0.21	0.150522	0.150471	5.06497e-05	Au	Metal	quasi-spherical			25	10.2	6.1	20	0.150172	0.150311	0.149665	0.149838	0.146987	0.15045	0.150259	0.149636	0.00318506	-0.000139687	-0.000593854	0.000201715	-	None	None	0	0	0.150515	0.150515	0.150515	0.150515	0		Djafari, J., Marinho, C., Santos, T., Igrejas, G., Torres, C., Capelo, J. L., ... & Fernández‐Lodeiro, J. (2016). New Synthesis of Gold‐and Silver‐Based Nano‐Tetracycline Composites. ChemistryOpen, 5(3), 206.
25	Tetracycline	CHEMBL1440	Escherichia coli	K12 ATCC 29425	16	50	1	1	0.99	75.6753	ChEMBL	-0.21	0.150522	0.150438	8.38307e-05	Ag	Metal	quasi-spherical			15	10.3	7.9	20	0.150169	0.15025	0.150009	0.149838	0.147034	0.15045	0.15026	0.149743	0.00313514	-0.000200319	-0.00025105	9.49778e-05	-	None	None	0	0	0.150515	0.150515	0.150515	0.150515	0		Djafari, J., Marinho, C., Santos, T., Igrejas, G., Torres, C., Capelo, J. L., ... & Fernández‐Lodeiro, J. (2016). New Synthesis of Gold‐and Silver‐Based Nano‐Tetracycline Composites. ChemistryOpen, 5(3), 206.
26	Tetracycline	CHEMBL1440	Escherichia coli	ST648	25	50	1	1	0.99	76.5852	ChEMBL	-0.21	0.150522	0.150463	5.90344e-05	Ag	Metal	quasi-spherical			15	10.3	7.9	20	0.150169	0.15025	0.150009	0.149838	0.14324	0.150438	0.150319	0.150247	0.00692894	-0.00018795	-0.000309998	-0.000408858	-	None	None	0	0	0.150515	0.150515	0.150515	0.150515	0		Djafari, J., Marinho, C., Santos, T., Igrejas, G., Torres, C., Capelo, J. L., ... & Fernández‐Lodeiro, J. (2016). New Synthesis of Gold‐and Silver‐Based Nano‐Tetracycline Composites. ChemistryOpen, 5(3), 206.
27	Tetracycline	CHEMBL1440	Staphylococcus aureus	ATCC25923	16	50	1	1	0.99	75.9076	ChEMBL	-0.21	0.150522	0.150471	5.06497e-05	Ag	Metal	quasi-spherical			15	10.3	7.9	20	0.150169	0.15025	0.150009	0.149838	0.146987	0.15045	0.150259	0.149636	0.00318168	-0.000200338	-0.000249926	0.000201715	-	None	None	0	0	0.150515	0.150515	0.150515	0.150515	0		Djafari, J., Marinho, C., Santos, T., Igrejas, G., Torres, C., Capelo, J. L., ... & Fernández‐Lodeiro, J. (2016). New Synthesis of Gold‐and Silver‐Based Nano‐Tetracycline Composites. ChemistryOpen, 5(3), 206.
28	Tetracycline	CHEMBL1440	Escherichia coli	K12 ATCC 29425	32	50	1	1	0.99	75.6753	ChEMBL	-0.21	0.150522	0.150438	8.38307e-05	Ag	Metal	quasi-spherical			15	10.3	7.9	20	0.150169	0.15025	0.150009	0.149838	0.147034	0.15045	0.15026	0.149743	0.00313514	-0.000200319	-0.00025105	9.49778e-05	-	None	None	0	0	0.150515	0.150515	0.150515	0.150515	0		Djafari, J., Marinho, C., Santos, T., Igrejas, G., Torres, C., Capelo, J. L., ... & Fernández‐Lodeiro, J. (2016). New Synthesis of Gold‐and Silver‐Based Nano‐Tetracycline Composites. ChemistryOpen, 5(3), 206.
29	Tetracycline	CHEMBL1440	Escherichia coli	ST648	40	50	1	1	0.99	76.5852	ChEMBL	-0.21	0.150522	0.150463	5.90344e-05	Ag	Metal	quasi-spherical			15	10.3	7.9	20	0.150169	0.15025	0.150009	0.149838	0.14324	0.150438	0.150319	0.150247	0.00692894	-0.00018795	-0.000309998	-0.000408858	-	None	None	0	0	0.150515	0.150515	0.150515	0.150515	0		Djafari, J., Marinho, C., Santos, T., Igrejas, G., Torres, C., Capelo, J. L., ... & Fernández‐Lodeiro, J. (2016). New Synthesis of Gold‐and Silver‐Based Nano‐Tetracycline Composites. ChemistryOpen, 5(3), 206.
30	Tetracycline	CHEMBL1440	Staphylococcus aureus	ATCC25923	32	50	1	1	0.99	75.9076	ChEMBL	-0.21	0.150522	0.150471	5.06497e-05	Ag	Metal	quasi-spherical			15	10.3	7.9	20	0.150169	0.15025	0.150009	0.149838	0.146987	0.15045	0.150259	0.149636	0.00318168	-0.000200338	-0.000249926	0.000201715	-	None	None	0	0	0.150515	0.150515	0.150515	0.150515	0		Djafari, J., Marinho, C., Santos, T., Igrejas, G., Torres, C., Capelo, J. L., ... & Fernández‐Lodeiro, J. (2016). New Synthesis of Gold‐and Silver‐Based Nano‐Tetracycline Composites. ChemistryOpen, 5(3), 206.
31	Polymyxin B	CHEMBL3989738	Acinetobacter baumannii	aba1604	0.00363636	50	1	1	0.99	76.619	DrugBank, AlogPS	-0.89	0.150545	0.150541	3.13105e-06	Ag	Metal	Spherical			8.4	10.3	7.9	18	0.150169	0.15025	0.150233	0.149907	0.14296	0.15043	0.150311	0.150439	0.00720865	-0.00018009	-7.75296e-05	-0.000532144	-	None	None	0	0	0.150515	0.150515	0.150515	0.150515	0		Wan, G., Ruan, L., Yin, Y., Yang, T., Ge, M., & Cheng, X. (2016). Effects of silver nanoparticles in combination with antibiotics on the resistant bacteria Acinetobacter baumannii. International journal of nanomedicine, 11, 3789.
32	Rifampicin	CHEMBL374478	Acinetobacter baumannii	aba1604	0.527402	50	1	1	0.99	76.8551	ChEMBL	4.34	0.15037	0.150541	-0.000171601	Ag	Metal	Spherical			8.4	10.3	7.9	18	0.150169	0.15025	0.150233	0.149907	0.14296	0.15043	0.150311	0.150439	0.00720865	-0.00018009	-7.75296e-05	-0.000532144	-	None	None	0	0	0.150515	0.150515	0.150515	0.150515	0		Wan, G., Ruan, L., Yin, Y., Yang, T., Ge, M., & Cheng, X. (2016). Effects of silver nanoparticles in combination with antibiotics on the resistant bacteria Acinetobacter baumannii. International journal of nanomedicine, 11, 3789.
33	Tigecycline	CHEMBL376140	Acinetobacter baumannii	aba1604	1.04093	50	1	1	0.99	76.682	ChEMBL	0.51	0.150498	0.150541	-4.34971e-05	Ag	Metal	Spherical			8.4	10.3	7.9	18	0.150169	0.15025	0.150233	0.149907	0.14296	0.15043	0.150311	0.150439	0.00720865	-0.00018009	-7.75296e-05	-0.000532144	-	None	None	0	0	0.150515	0.150515	0.150515	0.150515	0		Wan, G., Ruan, L., Yin, Y., Yang, T., Ge, M., & Cheng, X. (2016). Effects of silver nanoparticles in combination with antibiotics on the resistant bacteria Acinetobacter baumannii. International journal of nanomedicine, 11, 3789.
34	Chloramphenicol	CHEMBL130	Escherichia coli	n.d.	10.1415	50	1	1	0.99	75.9674	ChEMBL	0.91	0.150485	0.150343	0.000141957	Ag	Metal	Spherical			35	10.3	7.9	24	0.150169	0.15025	0.149316	0.1497	0.14296	0.15043	0.150311	0.150444	0.00720865	-0.00018009	-0.00099476	-0.00074392	PVP	Single	Polymer	20.31	0	0.149827	0.150515	0.150532	0.150515	-0.000704515		Vazquez-Muñoz, R., Meza-Villezcas, A., Fournier, P. G. J., Soria-Castro, E., Juarez-Moreno, K., Gallego-Hernández, A. L., ... & Huerta-Saquero, A. (2019). Enhancement of antibiotics antimicrobial activity due to the silver nanoparticles impact on the cell membrane. PloS one, 14(11), e0224904.
35	Chloramphenicol	CHEMBL130	Salmonella enterica serovar Typhimurium	ATCCSC14028	10.4762	50	1	1	0.99	74.3007	ChEMBL	0.91	0.150485	0.150515	-3.03401e-05	Ag	Metal	Spherical			35	10.3	7.9	24	0.150169	0.15025	0.149316	0.1497	0.150169	0.15025	0.149316	0.1497	0	0	0	0	PVP	Single	Polymer	20.31	0	0.149827	0.150515	0.150532	0.150515	-0.000704515	Av. Exp. Cases	Vazquez-Muñoz, R., Meza-Villezcas, A., Fournier, P. G. J., Soria-Castro, E., Juarez-Moreno, K., Gallego-Hernández, A. L., ... & Huerta-Saquero, A. (2019). Enhancement of antibiotics antimicrobial activity due to the silver nanoparticles impact on the cell membrane. PloS one, 14(11), e0224904.
36	Chloramphenicol	CHEMBL130	Staphylococcus aureus	n.d.	17.5362	50	1	1	0.99	75.6364	ChEMBL	0.91	0.150485	0.150471	1.33144e-05	Ag	Metal	Spherical			35	10.3	7.9	24	0.150169	0.15025	0.149316	0.1497	0.146987	0.15045	0.150259	0.149636	0.00318168	-0.000200338	-0.000943099	6.37161e-05	PVP	Single	Polymer	20.31	0	0.149827	0.150515	0.150532	0.150515	-0.000704515		Vazquez-Muñoz, R., Meza-Villezcas, A., Fournier, P. G. J., Soria-Castro, E., Juarez-Moreno, K., Gallego-Hernández, A. L., ... & Huerta-Saquero, A. (2019). Enhancement of antibiotics antimicrobial activity due to the silver nanoparticles impact on the cell membrane. PloS one, 14(11), e0224904.
37	Kanamycin	CHEMBL1384	Escherichia coli	n.d.	21.9565	50	1	1	0.99	75.6003	ChEMBL	-7.29	0.150756	0.150343	0.000413726	Ag	Metal	Spherical			35	10.3	7.9	24	0.150169	0.15025	0.149316	0.1497	0.14296	0.15043	0.150311	0.150444	0.00720865	-0.00018009	-0.00099476	-0.00074392	PVP	Single	Polymer	20.31	0	0.149827	0.150515	0.150532	0.150515	-0.000704515		Vazquez-Muñoz, R., Meza-Villezcas, A., Fournier, P. G. J., Soria-Castro, E., Juarez-Moreno, K., Gallego-Hernández, A. L., ... & Huerta-Saquero, A. (2019). Enhancement of antibiotics antimicrobial activity due to the silver nanoparticles impact on the cell membrane. PloS one, 14(11), e0224904.
38	Kanamycin	CHEMBL1384	Salmonella enterica serovar Typhimurium	ATCCSC14028	21.8085	50	1	1	0.99	73.9335	ChEMBL	-7.29	0.150756	0.150515	0.000241429	Ag	Metal	Spherical			35	10.3	7.9	24	0.150169	0.15025	0.149316	0.1497	0.150169	0.15025	0.149316	0.1497	0	0	0	0	PVP	Single	Polymer	20.31	0	0.149827	0.150515	0.150532	0.150515	-0.000704515		Vazquez-Muñoz, R., Meza-Villezcas, A., Fournier, P. G. J., Soria-Castro, E., Juarez-Moreno, K., Gallego-Hernández, A. L., ... & Huerta-Saquero, A. (2019). Enhancement of antibiotics antimicrobial activity due to the silver nanoparticles impact on the cell membrane. PloS one, 14(11), e0224904.
39	Ampicillin	CHEMBL174	Enterococcus faecium	ATCC 19434	0.0208333	50	1	1	0.99	76.4489	ChEMBL	0.32	0.150504	0.150604	-9.97288e-05	Ag	Metal	Spherical			3	10.3	7.9	24	0.150169	0.15025	0.150415	0.1497	0.14296	0.15043	0.150311	0.150444	0.00720865	-0.00018009	0.000104044	-0.00074392	-	None	None	0	0	0.150515	0.150515	0.150515	0.150515	0		Hwang, I. S., Hwang, J. H., Choi, H., Kim, K. J., & Lee, D. G. (2012). Synergistic effects between silver nanoparticles and antibiotics and the mechanisms involved. Journal of medical microbiology, 61(12), 1719-1726.
40	Ampicillin	CHEMBL174	Staphylococcus aureus	ATCC 25923	0.222222	50	1	1	0.99	75.7647	ChEMBL	0.32	0.150504	0.150471	3.29906e-05	Ag	Metal	Spherical			3	10.3	7.9	24	0.150169	0.15025	0.150415	0.1497	0.146987	0.15045	0.150259	0.149636	0.00318168	-0.000200338	0.000155706	6.37161e-05	-	None	None	0	0	0.150515	0.150515	0.150515	0.150515	0		Hwang, I. S., Hwang, J. H., Choi, H., Kim, K. J., & Lee, D. G. (2012). Synergistic effects between silver nanoparticles and antibiotics and the mechanisms involved. Journal of medical microbiology, 61(12), 1719-1726.
41	Ampicillin	CHEMBL174	Escherichia coli	O157-ATCC 43895	0.375	50	1	1	0.99	75.2473	ChEMBL	0.32	0.150504	0.150581	-7.68338e-05	Ag	Metal	Spherical			3	10.3	7.9	24	0.150169	0.15025	0.150415	0.1497	0.146251	0.150445	0.150292	0.150267	0.00391776	-0.000194534	0.000122632	-0.00056718	-	None	None	0	0	0.150515	0.150515	0.150515	0.150515	0		Hwang, I. S., Hwang, J. H., Choi, H., Kim, K. J., & Lee, D. G. (2012). Synergistic effects between silver nanoparticles and antibiotics and the mechanisms involved. Journal of medical microbiology, 61(12), 1719-1726.
42	Ampicillin	CHEMBL174	Escherichia coli	ATCC 25922	0.222222	50	1	1	0.99	75.6355	ChEMBL	0.32	0.150504	0.150514	-1.01069e-05	Ag	Metal	Spherical			3	10.3	7.9	24	0.150169	0.15025	0.150415	0.1497	0.147034	0.15045	0.15026	0.149743	0.00313514	-0.000200319	0.000154582	-4.30208e-05	-	None	None	0	0	0.150515	0.150515	0.150515	0.150515	0		Hwang, I. S., Hwang, J. H., Choi, H., Kim, K. J., & Lee, D. G. (2012). Synergistic effects between silver nanoparticles and antibiotics and the mechanisms involved. Journal of medical microbiology, 61(12), 1719-1726.
43	Ampicillin	CHEMBL174	Pseudomonas aeruginosa	ATCC 27853	0.6	50	1	1	0.99	76.2531	ChEMBL	0.32	0.150504	0.150394	0.000110735	Ag	Metal	Spherical			3	10.3	7.9	24	0.150169	0.15025	0.150415	0.1497	0.143772	0.150435	0.150297	0.150159	0.00639649	-0.000184622	0.000117522	-0.000459444	-	None	None	0	0	0.150515	0.150515	0.150515	0.150515	0		Hwang, I. S., Hwang, J. H., Choi, H., Kim, K. J., & Lee, D. G. (2012). Synergistic effects between silver nanoparticles and antibiotics and the mechanisms involved. Journal of medical microbiology, 61(12), 1719-1726.
44	Ampicillin	CHEMBL174	Streptococcus mutans	KCTC 3065	0.2	50	1	1	0.99	74.3868	ChEMBL	0.32	0.150504	0.150582	-7.74723e-05	Ag	Metal	Spherical			3	10.3	7.9	24	0.150169	0.15025	0.150415	0.1497	0.150169	0.15025	0.150415	0.1497	0	0	0	0	-	None	None	0	0	0.150515	0.150515	0.150515	0.150515	0	Av. Exp. Cases	Hwang, I. S., Hwang, J. H., Choi, H., Kim, K. J., & Lee, D. G. (2012). Synergistic effects between silver nanoparticles and antibiotics and the mechanisms involved. Journal of medical microbiology, 61(12), 1719-1726.
45	Chloramphenicol	CHEMBL130	Enterococcus faecium	ATCC 19434	0.0882353	50	1	1	0.99	76.1083	ChEMBL	-7.29	0.150756	0.150604	0.000152364	Ag	Metal	Spherical			3	10.3	7.9	24	0.150169	0.15025	0.150415	0.1497	0.14296	0.15043	0.150311	0.150444	0.00720865	-0.00018009	0.000104044	-0.00074392	-	None	None	0	0	0.150515	0.150515	0.150515	0.150515	0		Hwang, I. S., Hwang, J. H., Choi, H., Kim, K. J., & Lee, D. G. (2012). Synergistic effects between silver nanoparticles and antibiotics and the mechanisms involved. Journal of medical microbiology, 61(12), 1719-1726.
46	Chloramphenicol	CHEMBL130	Staphylococcus aureus	ATCC 25923	0.3	50	1	1	0.99	75.4241	ChEMBL	-7.29	0.150756	0.150471	0.000285084	Ag	Metal	Spherical			3	10.3	7.9	24	0.150169	0.15025	0.150415	0.1497	0.146987	0.15045	0.150259	0.149636	0.00318168	-0.000200338	0.000155706	6.37161e-05	-	None	None	0	0	0.150515	0.150515	0.150515	0.150515	0		Hwang, I. S., Hwang, J. H., Choi, H., Kim, K. J., & Lee, D. G. (2012). Synergistic effects between silver nanoparticles and antibiotics and the mechanisms involved. Journal of medical microbiology, 61(12), 1719-1726.
47	Chloramphenicol	CHEMBL130	Escherichia coli	O157-ATCC 43895	0.666667	50	1	1	0.99	74.9067	ChEMBL	-7.29	0.150756	0.150581	0.000175259	Ag	Metal	Spherical			3	10.3	7.9	24	0.150169	0.15025	0.150415	0.1497	0.146251	0.150445	0.150292	0.150267	0.00391776	-0.000194534	0.000122632	-0.00056718	-	None	None	0	0	0.150515	0.150515	0.150515	0.150515	0		Hwang, I. S., Hwang, J. H., Choi, H., Kim, K. J., & Lee, D. G. (2012). Synergistic effects between silver nanoparticles and antibiotics and the mechanisms involved. Journal of medical microbiology, 61(12), 1719-1726.
48	Chloramphenicol	CHEMBL130	Escherichia coli	ATCC 25922	0.2	50	1	1	0.99	75.2949	ChEMBL	-7.29	0.150756	0.150514	0.000241986	Ag	Metal	Spherical			3	10.3	7.9	24	0.150169	0.15025	0.150415	0.1497	0.147034	0.15045	0.15026	0.149743	0.00313514	-0.000200319	0.000154582	-4.30208e-05	-	None	None	0	0	0.150515	0.150515	0.150515	0.150515	0		Hwang, I. S., Hwang, J. H., Choi, H., Kim, K. J., & Lee, D. G. (2012). Synergistic effects between silver nanoparticles and antibiotics and the mechanisms involved. Journal of medical microbiology, 61(12), 1719-1726.
49	Chloramphenicol	CHEMBL130	Pseudomonas aeruginosa	ATCC 27853	0.666667	50	1	1	0.99	75.9125	ChEMBL	-7.29	0.150756	0.150394	0.000362828	Ag	Metal	Spherical			3	10.3	7.9	24	0.150169	0.15025	0.150415	0.1497	0.143772	0.150435	0.150297	0.150159	0.00639649	-0.000184622	0.000117522	-0.000459444	-	None	None	0	0	0.150515	0.150515	0.150515	0.150515	0		Hwang, I. S., Hwang, J. H., Choi, H., Kim, K. J., & Lee, D. G. (2012). Synergistic effects between silver nanoparticles and antibiotics and the mechanisms involved. Journal of medical microbiology, 61(12), 1719-1726.
50	Chloramphenicol	CHEMBL130	Streptococcus mutans	KCTC 3065	0.125	50	1	1	0.99	74.0462	ChEMBL	-7.29	0.150756	0.150582	0.000174621	Ag	Metal	Spherical			3	10.3	7.9	24	0.150169	0.15025	0.150415	0.1497	0.150169	0.15025	0.150415	0.1497	0	0	0	0	-	None	None	0	0	0.150515	0.150515	0.150515	0.150515	0	Av. Exp. Cases	Hwang, I. S., Hwang, J. H., Choi, H., Kim, K. J., & Lee, D. G. (2012). Synergistic effects between silver nanoparticles and antibiotics and the mechanisms involved. Journal of medical microbiology, 61(12), 1719-1726.
51	Kanamycin	CHEMBL1384	Enterococcus faecium	ATCC 19434	0.166667	50	1	1	0.99	76.4755	ChEMBL	0.91	0.150485	0.150604	-0.000119405	Ag	Metal	Spherical			3	10.3	7.9	24	0.150169	0.15025	0.150415	0.1497	0.14296	0.15043	0.150311	0.150444	0.00720865	-0.00018009	0.000104044	-0.00074392	-	None	None	0	0	0.150515	0.150515	0.150515	0.150515	0		Hwang, I. S., Hwang, J. H., Choi, H., Kim, K. J., & Lee, D. G. (2012). Synergistic effects between silver nanoparticles and antibiotics and the mechanisms involved. Journal of medical microbiology, 61(12), 1719-1726.
52	Kanamycin	CHEMBL1384	Staphylococcus aureus	ATCC 25923	0.166667	50	1	1	0.99	75.7913	ChEMBL	0.91	0.150485	0.150471	1.33144e-05	Ag	Metal	Spherical			3	10.3	7.9	24	0.150169	0.15025	0.150415	0.1497	0.146987	0.15045	0.150259	0.149636	0.00318168	-0.000200338	0.000155706	6.37161e-05	-	None	None	0	0	0.150515	0.150515	0.150515	0.150515	0		Hwang, I. S., Hwang, J. H., Choi, H., Kim, K. J., & Lee, D. G. (2012). Synergistic effects between silver nanoparticles and antibiotics and the mechanisms involved. Journal of medical microbiology, 61(12), 1719-1726.
53	Kanamycin	CHEMBL1384	Escherichia coli	O157-ATCC 43895	0.5	50	1	1	0.99	75.2738	ChEMBL	0.91	0.150485	0.150581	-9.651e-05	Ag	Metal	Spherical			3	10.3	7.9	24	0.150169	0.15025	0.150415	0.1497	0.146251	0.150445	0.150292	0.150267	0.00391776	-0.000194534	0.000122632	-0.00056718	-	None	None	0	0	0.150515	0.150515	0.150515	0.150515	0		Hwang, I. S., Hwang, J. H., Choi, H., Kim, K. J., & Lee, D. G. (2012). Synergistic effects between silver nanoparticles and antibiotics and the mechanisms involved. Journal of medical microbiology, 61(12), 1719-1726.
54	Kanamycin	CHEMBL1384	Escherichia coli	ATCC 25922	0.222222	50	1	1	0.99	75.6621	ChEMBL	0.91	0.150485	0.150514	-2.97831e-05	Ag	Metal	Spherical			3	10.3	7.9	24	0.150169	0.15025	0.150415	0.1497	0.147034	0.15045	0.15026	0.149743	0.00313514	-0.000200319	0.000154582	-4.30208e-05	-	None	None	0	0	0.150515	0.150515	0.150515	0.150515	0		Hwang, I. S., Hwang, J. H., Choi, H., Kim, K. J., & Lee, D. G. (2012). Synergistic effects between silver nanoparticles and antibiotics and the mechanisms involved. Journal of medical microbiology, 61(12), 1719-1726.
55	Kanamycin	CHEMBL1384	Pseudomonas aeruginosa	ATCC 27853	0.5	50	1	1	0.99	76.2797	ChEMBL	0.91	0.150485	0.150394	9.1059e-05	Ag	Metal	Spherical			3	10.3	7.9	24	0.150169	0.15025	0.150415	0.1497	0.143772	0.150435	0.150297	0.150159	0.00639649	-0.000184622	0.000117522	-0.000459444	-	None	None	0	0	0.150515	0.150515	0.150515	0.150515	0		Hwang, I. S., Hwang, J. H., Choi, H., Kim, K. J., & Lee, D. G. (2012). Synergistic effects between silver nanoparticles and antibiotics and the mechanisms involved. Journal of medical microbiology, 61(12), 1719-1726.
56	Kanamycin	CHEMBL1384	Streptococcus mutans	KCTC 3065	0.15	50	1	1	0.99	74.4134	ChEMBL	0.91	0.150485	0.150582	-9.71485e-05	Ag	Metal	Spherical			3	10.3	7.9	24	0.150169	0.15025	0.150415	0.1497	0.150169	0.15025	0.150415	0.1497	0	0	0	0	-	None	None	0	0	0.150515	0.150515	0.150515	0.150515	0	Av. Exp. Cases	Hwang, I. S., Hwang, J. H., Choi, H., Kim, K. J., & Lee, D. G. (2012). Synergistic effects between silver nanoparticles and antibiotics and the mechanisms involved. Journal of medical microbiology, 61(12), 1719-1726.
57	Gentamicin	CHEMBL329592	Escherichia coli	K12	7.4	50	1	1	0.99	76.324	ChEMBL	-3.18	0.150621	0.150532	8.91221e-05	Au	Metal	N/A			16	10.2	6.1	24	0.150172	0.150311	0.149975	0.1497	0.14324	0.150438	0.150319	0.150247	0.00693233	-0.000127299	-0.00034415	-0.000546857	-	None	None	0	0	0.150515	0.150515	0.150515	0.150515	0		Burygin, G. L., Khlebtsov, B. N., Shantrokha, A. N., Dykman, L. A., Bogatyrev, V. A., & Khlebtsov, N. G. (2009). On the enhanced antibacterial activity of antibiotics mixed with gold nanoparticles. Nanoscale research letters, 4(8), 794-801.
58	Ampicillin	CHEMBL174	Escherichia coli	DH5α	45	50	1	1	0.99	76.4913	ChEMBL	0.32	0.150504	0.150532	-2.72124e-05	Au	Metal	N/A			13.54	10.2	6.1	24	0.150172	0.150311	0.150059	0.1497	0.14324	0.150438	0.150319	0.150247	0.00693233	-0.000127299	-0.000260232	-0.000546857	-	None	None	0	0	0.150515	0.150515	0.150515	0.150515	0		Saha, B., Bhattacharya, J., Mukherjee, A., Ghosh, A., Santra, C., Dasgupta, A. K., & Karmakar, P. (2007). In vitro structural and functional evaluation of gold nanoparticles conjugated antibiotics. Nanoscale Research Letters, 2(12), 614-622.
59	Streptomycin	CHEMBL372795	Escherichia coli	DH5α	7	50	1	1	0.99	76.1121	ChEMBL	-8.16	0.150785	0.150532	0.0002535	Au	Metal	N/A			13.54	10.2	6.1	24	0.150172	0.150311	0.150059	0.1497	0.14324	0.150438	0.150319	0.150247	0.00693233	-0.000127299	-0.000260232	-0.000546857	-	None	None	0	0	0.150515	0.150515	0.150515	0.150515	0		Saha, B., Bhattacharya, J., Mukherjee, A., Ghosh, A., Santra, C., Dasgupta, A. K., & Karmakar, P. (2007). In vitro structural and functional evaluation of gold nanoparticles conjugated antibiotics. Nanoscale Research Letters, 2(12), 614-622.
60	Kanamycin	CHEMBL1384	Escherichia coli	DH5α	12	50	1	1	0.99	76.5179	ChEMBL	0.91	0.150485	0.150532	-4.68886e-05	Au	Metal	N/A			13.54	10.2	6.1	24	0.150172	0.150311	0.150059	0.1497	0.14324	0.150438	0.150319	0.150247	0.00693233	-0.000127299	-0.000260232	-0.000546857	-	None	None	0	0	0.150515	0.150515	0.150515	0.150515	0		Saha, B., Bhattacharya, J., Mukherjee, A., Ghosh, A., Santra, C., Dasgupta, A. K., & Karmakar, P. (2007). In vitro structural and functional evaluation of gold nanoparticles conjugated antibiotics. Nanoscale Research Letters, 2(12), 614-622.
61	Ampicillin	CHEMBL174	Micrococcus luteus	n.d.	0.45	50	1	1	0.99	74.1696	ChEMBL	0.32	0.150504	0.150421	8.3325e-05	Au	Metal	N/A			13.54	10.2	6.1	24	0.150172	0.150311	0.150059	0.1497	0.150172	0.150311	0.150059	0.1497	0	0	0	0	-	None	None	0	0	0.150515	0.150515	0.150515	0.150515	0		Saha, B., Bhattacharya, J., Mukherjee, A., Ghosh, A., Santra, C., Dasgupta, A. K., & Karmakar, P. (2007). In vitro structural and functional evaluation of gold nanoparticles conjugated antibiotics. Nanoscale Research Letters, 2(12), 614-622.
62	Streptomycin	CHEMBL372795	Micrococcus luteus	n.d.	17	50	1	1	0.99	73.7903	ChEMBL	-8.16	0.150785	0.150421	0.000364037	Au	Metal	N/A			13.54	10.2	6.1	24	0.150172	0.150311	0.150059	0.1497	0.150172	0.150311	0.150059	0.1497	0	0	0	0	-	None	None	0	0	0.150515	0.150515	0.150515	0.150515	0		Saha, B., Bhattacharya, J., Mukherjee, A., Ghosh, A., Santra, C., Dasgupta, A. K., & Karmakar, P. (2007). In vitro structural and functional evaluation of gold nanoparticles conjugated antibiotics. Nanoscale Research Letters, 2(12), 614-622.
63	Kanamycin	CHEMBL1384	Micrococcus luteus	n.d.	23	50	1	1	0.99	74.1962	ChEMBL	0.91	0.150485	0.150421	6.36488e-05	Au	Metal	N/A			13.54	10.2	6.1	24	0.150172	0.150311	0.150059	0.1497	0.150172	0.150311	0.150059	0.1497	0	0	0	0	-	None	None	0	0	0.150515	0.150515	0.150515	0.150515	0		Saha, B., Bhattacharya, J., Mukherjee, A., Ghosh, A., Santra, C., Dasgupta, A. K., & Karmakar, P. (2007). In vitro structural and functional evaluation of gold nanoparticles conjugated antibiotics. Nanoscale Research Letters, 2(12), 614-622.
64	Ampicillin	CHEMBL174	Staphylococcus aureus	n.d.	0.37	50	1	1	0.99	75.373	ChEMBL	0.32	0.150504	0.150471	3.29906e-05	Au	Metal	N/A			13.54	10.2	6.1	24	0.150172	0.150311	0.150059	0.1497	0.147403	0.150425	0.15039	0.149731	0.00276929	-0.000114317	-0.000331044	-3.11552e-05	-	None	None	0	0	0.150515	0.150515	0.150515	0.150515	0		Saha, B., Bhattacharya, J., Mukherjee, A., Ghosh, A., Santra, C., Dasgupta, A. K., & Karmakar, P. (2007). In vitro structural and functional evaluation of gold nanoparticles conjugated antibiotics. Nanoscale Research Letters, 2(12), 614-622.
65	Kanamycin	CHEMBL1384	Staphylococcus aureus	n.d.	5.8	50	1	1	0.99	75.3996	ChEMBL	0.91	0.150485	0.150471	1.33144e-05	Au	Metal	N/A			13.54	10.2	6.1	24	0.150172	0.150311	0.150059	0.1497	0.147403	0.150425	0.15039	0.149731	0.00276929	-0.000114317	-0.000331044	-3.11552e-05	-	None	None	0	0	0.150515	0.150515	0.150515	0.150515	0		Saha, B., Bhattacharya, J., Mukherjee, A., Ghosh, A., Santra, C., Dasgupta, A. K., & Karmakar, P. (2007). In vitro structural and functional evaluation of gold nanoparticles conjugated antibiotics. Nanoscale Research Letters, 2(12), 614-622.
66	Vancomycin	CHEMBL262777	Staphylococcus aureus	n.d.	8	50	1	1	0.99	76.3144	DrugBank, AlogPS	1.11	0.150478	0.150471	6.64022e-06	Au	Metal	Spherical		8.4 ± 1.3 nm	8.4	10.2	6.1	14	0.150172	0.150311	0.150233	0.150043	0.146987	0.15045	0.150259	0.149636	0.00318506	-0.000139687	-2.58682e-05	0.00040711	-	None	None	0	0	0.150515	0.150515	0.150515	0.150515	0		Lai, H. Z., Chen, W. Y., Wu, C. Y., & Chen, Y. C. (2015). Potent antibacterial nanoparticles for pathogenic bacteria. ACS applied materials & interfaces, 7(3), 2046-2054.
67	Vancomycin	CHEMBL262777	Staphylococcus aureus	MRSA	8	50	1	1	0.99	76.8838	DrugBank, AlogPS	1.11	0.150478	0.150471	6.64022e-06	Au	Metal	Spherical		8.4 ± 1.3 nm	8.4	10.2	6.1	14	0.150172	0.150311	0.150233	0.150043	0.144035	0.150436	0.150293	0.150101	0.00613712	-0.000125438	-5.96911e-05	-5.77179e-05	-	None	None	0	0	0.150515	0.150515	0.150515	0.150515	0		Lai, H. Z., Chen, W. Y., Wu, C. Y., & Chen, Y. C. (2015). Potent antibacterial nanoparticles for pathogenic bacteria. ACS applied materials & interfaces, 7(3), 2046-2054.
68	Vancomycin	CHEMBL262777	Escherichia coli	J96	8	50	1	1	0.99	75.7029	DrugBank, AlogPS	1.11	0.150478	0.150505	-2.65242e-05	Au	Metal	Spherical		8.4 ± 1.3 nm	8.4	10.2	6.1	14	0.150172	0.150311	0.150233	0.150043	0.146467	0.150443	0.150317	0.150198	0.00370506	-0.000132647	-8.38061e-05	-0.000154824	-	None	None	0	0	0.150515	0.150515	0.150515	0.150515	0		Lai, H. Z., Chen, W. Y., Wu, C. Y., & Chen, Y. C. (2015). Potent antibacterial nanoparticles for pathogenic bacteria. ACS applied materials & interfaces, 7(3), 2046-2054.
69	Vancomycin	CHEMBL262777	Escherichia coli	O157:H7	8	50	1	1	0.99	75.2268	DrugBank, AlogPS	1.11	0.150478	0.150462	1.56929e-05	Au	Metal	Spherical		8.4 ± 1.3 nm	8.4	10.2	6.1	14	0.150172	0.150311	0.150233	0.150043	0.147094	0.15045	0.150262	0.150294	0.0030787	-0.000139645	-2.84367e-05	-0.000250809	-	None	None	0	0	0.150515	0.150515	0.150515	0.150515	0		Lai, H. Z., Chen, W. Y., Wu, C. Y., & Chen, Y. C. (2015). Potent antibacterial nanoparticles for pathogenic bacteria. ACS applied materials & interfaces, 7(3), 2046-2054.
70	Vancomycin	CHEMBL262777	Acinetobacter baumannii	n.d.	8	50	1	1	0.99	76.922	DrugBank, AlogPS	1.11	0.150478	0.150541	-6.35131e-05	Au	Metal	Spherical		8.4 ± 1.3 nm	8.4	10.2	6.1	14	0.150172	0.150311	0.150233	0.150043	0.14296	0.15043	0.150311	0.150439	0.00721204	-0.000119439	-7.75296e-05	-0.000395428	-	None	None	0	0	0.150515	0.150515	0.150515	0.150515	0		Lai, H. Z., Chen, W. Y., Wu, C. Y., & Chen, Y. C. (2015). Potent antibacterial nanoparticles for pathogenic bacteria. ACS applied materials & interfaces, 7(3), 2046-2054.
71	Vancomycin	CHEMBL262777	Acinetobacter baumannii	PDRAB	8	50	1	1	0.99	76.922	DrugBank, AlogPS	1.11	0.150478	0.150541	-6.35131e-05	Au	Metal	Spherical		8.4 ± 1.3 nm	8.4	10.2	6.1	14	0.150172	0.150311	0.150233	0.150043	0.14296	0.15043	0.150311	0.150439	0.00721204	-0.000119439	-7.75296e-05	-0.000395428	-	None	None	0	0	0.150515	0.150515	0.150515	0.150515	0		Lai, H. Z., Chen, W. Y., Wu, C. Y., & Chen, Y. C. (2015). Potent antibacterial nanoparticles for pathogenic bacteria. ACS applied materials & interfaces, 7(3), 2046-2054.
72	Vancomycin	CHEMBL262777	Enterococcus faecalis	n.d.	16	50	1	1	0.99	77.0364	DrugBank, AlogPS	1.11	0.150478	0.150429	4.92319e-05	Au	Metal	Spherical		8.4 ± 1.3 nm	8.4	10.2	6.1	14	0.150172	0.150311	0.150233	0.150043	0.146615	0.150451	0.15025	0.149243	0.00355732	-0.000139836	-1.68785e-05	0.00080033	-	None	None	0	0	0.150515	0.150515	0.150515	0.150515	0		Lai, H. Z., Chen, W. Y., Wu, C. Y., & Chen, Y. C. (2015). Potent antibacterial nanoparticles for pathogenic bacteria. ACS applied materials & interfaces, 7(3), 2046-2054.
73	Vancomycin	CHEMBL262777	Enterococcus faecium	n.d.	16	50	1	1	0.99	76.6749	DrugBank, AlogPS	1.11	0.150478	0.150365	0.000113457	Au	Metal	Spherical		8.4 ± 1.3 nm	8.4	10.2	6.1	14	0.150172	0.150311	0.150233	0.150043	0.14296	0.15043	0.150311	0.150444	0.00721204	-0.000119439	-7.75296e-05	-0.000400527	-	None	None	0	0	0.150515	0.150515	0.150515	0.150515	0		Lai, H. Z., Chen, W. Y., Wu, C. Y., & Chen, Y. C. (2015). Potent antibacterial nanoparticles for pathogenic bacteria. ACS applied materials & interfaces, 7(3), 2046-2054.
74	Vancomycin	CHEMBL262777	Pseudomonas aeruginosa	n.d.	8	50	1	1	0.99	77.0037	DrugBank, AlogPS	1.11	0.150478	0.150445	3.25995e-05	Au	Metal	Spherical		8.4 ± 1.3 nm	8.4	10.2	6.1	14	0.150172	0.150311	0.150233	0.150043	0.146615	0.150451	0.15025	0.149278	0.00355732	-0.000139836	-1.68785e-05	0.000765023	-	None	None	0	0	0.150515	0.150515	0.150515	0.150515	0		Lai, H. Z., Chen, W. Y., Wu, C. Y., & Chen, Y. C. (2015). Potent antibacterial nanoparticles for pathogenic bacteria. ACS applied materials & interfaces, 7(3), 2046-2054.
75	Vancomycin	CHEMBL262777	Enterococcus faecalis	VRE 1	16	50	1	1	0.99	76.9422	DrugBank, AlogPS	1.11	0.150478	0.150359	0.000118995	Au	Metal	Spherical		8.4 ± 1.3 nm	8.4	10.2	6.1	14	0.150172	0.150311	0.150233	0.150043	0.146615	0.150451	0.15025	0.149243	0.00355732	-0.000139836	-1.68785e-05	0.00080033	-	None	None	0	0	0.150515	0.150515	0.150515	0.150515	0		Lai, H. Z., Chen, W. Y., Wu, C. Y., & Chen, Y. C. (2015). Potent antibacterial nanoparticles for pathogenic bacteria. ACS applied materials & interfaces, 7(3), 2046-2054.
76	Vancomycin	CHEMBL262777	Enterococcus faecium	VRE 4	32	50	1	1	0.99	76.551	DrugBank, AlogPS	1.11	0.150478	0.15041	6.80684e-05	Au	Metal	Spherical		8.4 ± 1.3 nm	8.4	10.2	6.1	14	0.150172	0.150311	0.150233	0.150043	0.146615	0.150451	0.15025	0.149537	0.00355732	-0.000139836	-1.68785e-05	0.000506003	-	None	None	0	0	0.150515	0.150515	0.150515	0.150515	0		Lai, H. Z., Chen, W. Y., Wu, C. Y., & Chen, Y. C. (2015). Potent antibacterial nanoparticles for pathogenic bacteria. ACS applied materials & interfaces, 7(3), 2046-2054.
77	Gentamicin	CHEMBL329592	Staphylococcus aureus	ATCC 43300 (MRSA)	1.11111	51	1	1	0.99	76.5598	ChEMBL	-3.18	0.150621	0.150471	0.000149325	Ag	Metal	Spherical		10–70 nm	40	10.3	7.9	14	0.150169	0.15025	0.149139	0.150043	0.144035	0.150436	0.150293	0.150101	0.00613373	-0.000186089	-0.00115352	-5.77179e-05	-	None	None	0	0	0.150515	0.150515	0.150515	0.150515	0		Punjabi, K., Mehta, S., Chavan, R., Chitalia, V., Deogharkar, D., & Deshpande, S. (2018). Efficiency of biosynthesized silver and zinc nanoparticles against multi-drug resistant pathogens. Frontiers in microbiology, 9, 2207.
78	Gentamicin	CHEMBL329592	Klebsiella pneumoniae	ATCC 700603 (ESBL)	0.375	52	1	1	0.99	76.5331	ChEMBL	-3.18	0.150621	0.15048	0.000140393	Ag	Metal	Spherical		10–70 nm	40	10.3	7.9	14	0.150169	0.15025	0.149139	0.150043	0.146615	0.150451	0.15025	0.149402	0.00355394	-0.000200487	-0.00111071	0.000641027	-	None	None	0	0	0.150515	0.150515	0.150515	0.150515	0		Punjabi, K., Mehta, S., Chavan, R., Chitalia, V., Deogharkar, D., & Deshpande, S. (2018). Efficiency of biosynthesized silver and zinc nanoparticles against multi-drug resistant pathogens. Frontiers in microbiology, 9, 2207.
79	Gentamicin	CHEMBL329592	Pseudomonas aeruginosa	ATCC 27853	0.868217	53	1	1	0.99	76.4788	ChEMBL	-3.18	0.150621	0.150394	0.00022707	Ag	Metal	Spherical		10–70 nm	40	10.3	7.9	14	0.150169	0.15025	0.149139	0.150043	0.143772	0.150435	0.150297	0.150159	0.00639649	-0.000184622	-0.00115788	-0.00011605	-	None	None	0	0	0.150515	0.150515	0.150515	0.150515	0		Punjabi, K., Mehta, S., Chavan, R., Chitalia, V., Deogharkar, D., & Deshpande, S. (2018). Efficiency of biosynthesized silver and zinc nanoparticles against multi-drug resistant pathogens. Frontiers in microbiology, 9, 2207.
80	Gentamicin	CHEMBL329592	Staphylococcus aureus	ATCC 43300 (MRSA)	1.11111	54	1	1	0.99	76.4882	ChEMBL	-3.18	0.150621	0.150471	0.000149325	Zn	Metal	Spherical		5–90 nm	60	9.164	6.4	14	0.150207	0.150301	0.14842	0.150043	0.144035	0.150436	0.150293	0.150101	0.00617218	-0.000135534	-0.00187299	-5.77179e-05	-	None	None	0	0	0.150515	0.150515	0.150515	0.150515	0		Punjabi, K., Mehta, S., Chavan, R., Chitalia, V., Deogharkar, D., & Deshpande, S. (2018). Efficiency of biosynthesized silver and zinc nanoparticles against multi-drug resistant pathogens. Frontiers in microbiology, 9, 2207.

## Sheet: AVG
DRUG ASSAYj			NP ASSAYnj							COATc		Coating Agent 01	Coating Agent 02
cd1 = Assay Org.	cd2 = Strain	<Sh1(ALOGPi)>	cn1 = Organism	cn2 = Strain	cn3 = Shape	<Sh1(AMVn)>	<Sh1(APn)>	<Sh1(APSn)>	<Sh1(Time)>	cc1 = Coating mult.	cc2 = Poly.	<Sh2(PSA1c)>	<Sh2(PSA2c)>
Aggregatibacter actinomycetemcomitans	ATCC29522	0.150454	Escherichia coli	K-12	Spherical	0.146467	0.150443	0.150317	0.150198	Double	Monomer	0.150498	0.150487
Aggregatibacter actinomycetemcomitans	CU1000	0.150347	Escherichia coli	ATCC 25254	N/A	0.145194	0.150424	0.150341	0.149316	Single	Monomer	0.150539	0.150515
Aggregatibacter actinomycetemcomitans	JCM 2434	0.150521	Escherichia coli	ATCC 11775	Spherical	0.14296	0.15043	0.150311	0.150439	Single	Polymer	0.150532	0.150515
Aggregatibacter actinomycetemcomitans	n.d	0.150391	Escherichia coli	MDR	Spherical	0.14296	0.15043	0.150311	0.150439	None	None	0.150515	0.150515
Bacillus subtilis	1.079	0.150427	Klebsiella pneumoniae	MDR	Spherical	0.14296	0.15043	0.150311	0.150439	Double	Polymer	0.148793	0.126944
Bacillus subtilis	3.34	0.150469	Acinetobacter baumannii	MDR	Spherical	0.14296	0.15043	0.150311	0.150439
Bacillus subtilis	6051	0.150473	Klebsiella pneumoniae	ATCC 13883	Spherical	0.14296	0.15043	0.150311	0.150439
Bacillus subtilis	6633	0.150468	Pseudomonas aeruginosa	ATCC 27853	Spherical	0.143772	0.150435	0.150297	0.150159
Bacillus subtilis	10707	0.15054	Pseudomonas aeruginosa	MDR	Spherical	0.14296	0.15043	0.150311	0.150439
Bacillus subtilis	19659	0.150347	Bacillus subtilis	MD	N/A	0.147403	0.150425	0.15039	0.149731
Bacillus subtilis	154921	0.150378	Staphylococcus aureus	MET-R	Spherical	0.144035	0.150436	0.150293	0.150101
Bacillus subtilis	ATCC6051	0.150362	Staphylococcus epidermidis	ATCC 12228	Spherical	0.14296	0.15043	0.150311	0.150444
Bacillus subtilis	10.10.2006	0.150433	Pseudomonas aeruginosa	MD	N/A	0.147403	0.150425	0.15039	0.149731
Bacillus subtilis	1S34	0.150435	Staphylococcus aureus	MD	N/A	0.147403	0.150425	0.15039	0.149731
Bacillus subtilis	6633 B1	0.150442	Escherichia coli	MD	N/A	0.147403	0.150425	0.15039	0.149731
Bacillus subtilis	AB91021	0.150511	Staphylococcus aureus	ATCC 6538P	Spherical	0.144083	0.150435	0.150301	0.150409
Bacillus subtilis	ACCC 11060	0.150457	Enterococcus faecium	MDR	Spherical	0.14296	0.15043	0.150311	0.150444
Bacillus subtilis	ATC6051	0.150351	Escherichia coli	K-12	N/A	0.14324	0.150438	0.150319	0.150247
Bacillus subtilis	ATCC10400	0.15039	Escherichia coli	ATCC 25922	Spherical	0.147034	0.15045	0.15026	0.149743
Bacillus subtilis	ATCC11229	0.150445	Bacillus subtilis	ATCC 6633	Spherical	0.147453	0.15045	0.15027	0.150304
Bacillus subtilis	ATCC11562	0.150482	Escherichia coli	ATCC 10536	N/A	0.14324	0.150438	0.150319	0.150247
Bacillus subtilis	ATCC11774	0.150407	Staphylococcus aureus	ATCC 29737	N/A	0.14324	0.150438	0.150319	0.150247
Bacillus subtilis	ATCC11775	0.150465	Bacillus subtilis	ATCC 6633	N/A	0.14324	0.150438	0.150319	0.150247
Bacillus subtilis	ATCC11778	0.150359	Staphylococcus aureus	ATCC 25923	Spherical	0.146987	0.15045	0.150259	0.149636
Bacillus subtilis	ATCC12711	0.150416	Staphylococcus aureus	ATCC 29213	Spherical	0.147453	0.15045	0.15027	0.150304
Bacillus subtilis	ATCC14579	0.150283	Escherichia coli	ATCC 8739	Spherical	0.146251	0.150445	0.150292	0.150267
Bacillus subtilis	ATCC19659	0.150485	Escherichia coli	ATCC 10536	Spherical	0.147094	0.15045	0.150262	0.150294
Bacillus subtilis	ATCC21216	0.150371	Staphylococcus aureus	ATCC 6538	Spherical	0.146615	0.150451	0.15025	0.15028
Bacillus subtilis	ATCC23857	0.150341	Salmonella enteritidis	MD	Spherical	0.141446	0.150422	0.15038	0.150118
Bacillus subtilis	ATCC25922	0.150326	Staphylococcus epidermidis	MET-R	Spherical	0.146615	0.150451	0.15025	0.149278
Bacillus subtilis	ATCC25923	0.150422	Staphylococcus epidermidis	MET-S	Spherical	0.146615	0.150451	0.15025	0.149278
Bacillus subtilis	ATCC33712	0.150338	Pseudomonas aeruginosa	MD	Spherical	0.146615	0.150451	0.15025	0.149278
Bacillus subtilis	ATCC451	0.15035	Enterococcus faecium	VCM-R	Spherical	0.146615	0.150451	0.15025	0.149537
Bacillus subtilis	ATCC461	0.150386	Klebsiella pneumoniae	ESBL-positive	Spherical	0.146615	0.150451	0.15025	0.149402
Bacillus subtilis	ATCC5061	0.150447	Enterococcus faecalis	ATCC 29212	Spherical	0.146615	0.150451	0.15025	0.149243
Bacillus subtilis	ATCC530	0.150405	Staphylococcus aureus	ATCC 6538	N/A	0.148417	0.150417	0.150437	0.148154
Bacillus subtilis	ATCC55572	0.150336	Staphylococcus aureus	ATCC 10832	Spherical	0.141446	0.150422	0.15038	0.150118
Bacillus subtilis	ATCC60511	0.150376	Staphylococcus aureus	ATCC 9144	Acicular	0.147627	0.15043	0.150395	0.149665
Bacillus subtilis	ATCC6538	0.150505	Escherichia coli	ATCC 10536	Acicular	0.147627	0.15043	0.150395	0.149665
Bacillus subtilis	ATCC6631	0.150335	Pseudomonas aeruginosa	ATCC 9027	Acicular	0.147627	0.15043	0.150395	0.149665
Bacillus subtilis	ATCC6633	0.150393	Escherichia coli	ATCC 25922	N/A	0.148417	0.150417	0.150437	0.148154
Bacillus subtilis	ATCC6638	0.150358	Salmonella enterica serovar Typhimurium	ATCCSC14028	Spherical	0.150169	0.15025	0.149316	0.1497
Bacillus subtilis	ATCC9372	0.150416	Streptococcus mutans	KCTC 3065	Spherical	0.150169	0.15025	0.150415	0.1497
Bacillus subtilis	BAS3023	0.150363	Micrococcus luteus	n.d.	N/A	0.150172	0.150311	0.150059	0.1497
Bacillus subtilis	BD54	0.150385
Bacillus subtilis	BR151	0.150362
Bacillus subtilis	C971	0.150449
Bacillus subtilis	CECT 35	0.150314
Bacillus subtilis	CECT 397	0.150401
Bacillus subtilis	CGMCC 1.1162	0.150322
Bacillus subtilis	CGMCC 1.1470	0.150321
Bacillus subtilis	CGMCC 1.88	0.15053
Bacillus subtilis	CGMCC1.1162	0.150261
Bacillus subtilis	CMCC 63501	0.150401
Bacillus subtilis	D101	0.150447
Bacillus subtilis	DSM 10	0.150428
Bacillus subtilis	DSM 1088	0.150444
Bacillus subtilis	DSM 2109	0.150287
Bacillus subtilis	DSM 347	0.150407
Bacillus subtilis	DSM10	0.15047
Bacillus subtilis	E345	0.15047
Bacillus subtilis	Ec221	0.150412
Bacillus subtilis	H17	0.150356
Bacillus subtilis	HM489	0.15038
Bacillus subtilis	IFO 3007	0.150363
Bacillus subtilis	IID 685	0.150444
Bacillus subtilis	IS34	0.150404
Bacillus subtilis	isolate 1	0.150659
Bacillus subtilis	isolate 10	0.150659
Bacillus subtilis	isolate 11	0.150659
Bacillus subtilis	isolate 12	0.150659
Bacillus subtilis	isolate 13	0.150659
Bacillus subtilis	isolate 14	0.150659
Bacillus subtilis	isolate 15	0.150659
Bacillus subtilis	isolate 16	0.150659
Bacillus subtilis	isolate 17	0.150659
Bacillus subtilis	isolate 18	0.150659
Bacillus subtilis	isolate 19	0.150659
Bacillus subtilis	isolate 2	0.150659
Bacillus subtilis	isolate 3	0.150659
Bacillus subtilis	isolate 4	0.150659
Bacillus subtilis	isolate 5	0.150659
Bacillus subtilis	isolate 6	0.150659
Bacillus subtilis	isolate 7	0.150659
Bacillus subtilis	isolate 8	0.150659
Bacillus subtilis	isolate 878	0.150322
Bacillus subtilis	isolate 9	0.150659
Bacillus subtilis	isolate KO-847	0.150659
Bacillus subtilis	isolate KO-875	0.150659
Bacillus subtilis	isolate KO-876	0.150659
Bacillus subtilis	isolate KO-877	0.150659
Bacillus subtilis	isolate KO-878	0.150659
Bacillus subtilis	isolate KO-879	0.150659
Bacillus subtilis	isolate KO-894	0.150659
Bacillus subtilis	JH642	0.150422
Bacillus subtilis	K-49	0.150426
Bacillus subtilis	KB211 ATCC6633	0.15042
Bacillus subtilis	KB340 JCM1465	0.15042
Bacillus subtilis	KB355 NBRC3134	0.15042
Bacillus subtilis	KCTC 1021	0.150445
Bacillus subtilis	KCTC 2213	0.150556
Bacillus subtilis	KCTC 3068	0.150436
Bacillus subtilis	LMA0011	0.150427
Bacillus subtilis	M15	0.150433
Bacillus subtilis	M45	0.150356
Bacillus subtilis	Marburg ATCC6051	0.15038
Bacillus subtilis	MB 964	0.150484
Bacillus subtilis	MB964	0.150353
Bacillus subtilis	MC1061	0.150692
Bacillus subtilis	MO3482	0.150447
Bacillus subtilis	MTCC 121	0.150373
Bacillus subtilis	MTCC 1456	0.15042
Bacillus subtilis	MTCC 1610	0.150338
Bacillus subtilis	MTCC 1789	0.150383
Bacillus subtilis	MTCC 2063	0.150384
Bacillus subtilis	MTCC 2397	0.150372
Bacillus subtilis	MTCC 2423	0.150419
Bacillus subtilis	MTCC 2423 Serovar 3	0.150397
Bacillus subtilis	MTCC 2451	0.150376
Bacillus subtilis	MTCC 2756	0.150516
Bacillus subtilis	MTCC 2763	0.150491
Bacillus subtilis	MTCC 297	0.150368
Bacillus subtilis	MTCC 430	0.150363
Bacillus subtilis	MTCC 441	0.15037
Bacillus subtilis	MTCC 4905	0.150472
Bacillus subtilis	MTCC 619	0.150351
Bacillus subtilis	MTCC 8509	0.150462
Bacillus subtilis	MTCC121	0.15039
Bacillus subtilis	MTCC-441	0.15044
Bacillus subtilis	n.d	0.150401
Bacillus subtilis	NBRC 13719	0.150379
Bacillus subtilis	NBRC 3134	0.15043
Bacillus subtilis	NBRC3134	0.150459
Bacillus subtilis	NCCB 1089	0.150706
Bacillus subtilis	NCIB 3610	0.150396
Bacillus subtilis	NCIB3610	0.150399
Bacillus subtilis	NCIM 2010	0.15041
Bacillus subtilis	NCIM 2063	0.150402
Bacillus subtilis	NCIM 2063/ATCC6633	0.150379
Bacillus subtilis	NCIM 2063; ATCC6633	0.150343
Bacillus subtilis	NCIM 2079	0.150378
Bacillus subtilis	NCIM 2156	0.150348
Bacillus subtilis	NCIM 2250	0.15042
Bacillus subtilis	NCIM 2439	0.150418
Bacillus subtilis	NCIM 2545	0.150415
Bacillus subtilis	NCIM 2546	0.150404
Bacillus subtilis	NCIM 2613	0.150382
Bacillus subtilis	NCIM 2718	0.150375
Bacillus subtilis	NCIM 2920	0.150405
Bacillus subtilis	NCIM 2921	0.15044
Bacillus subtilis	NCIM 2999	0.150474
Bacillus subtilis	NCIM-2063	0.150373
Bacillus subtilis	NCTC 10315	0.150471
Bacillus subtilis	NCTC 1040	0.150366
Bacillus subtilis	NCTC 10400	0.150338
Bacillus subtilis	NCTC 2116	0.150445
Bacillus subtilis	NCTC 9372	0.150354
Bacillus subtilis	NICM 2063	0.150483
Bacillus subtilis	NRRL B-543	0.150364
Bacillus subtilis	NRRL B-558	0.150495
Bacillus subtilis	NRS-744	0.150403
Bacillus subtilis	OKB105	0.150392
Bacillus subtilis	PC1219	0.150305
Bacillus subtilis	PCI 219	0.150494
Bacillus subtilis	PCI 219 IFO 3513	0.150446
Bacillus subtilis	PCI219	0.150446
Bacillus subtilis	PTCC 1023	0.150432
Bacillus subtilis	PTCC 1365	0.150458
Bacillus subtilis	PY79	0.150383
Bacillus subtilis	RCMB 000107	0.150456
Bacillus subtilis	RCMB 010063	0.150379
Bacillus subtilis	RCMB 010067	0.150405
Bacillus subtilis	RCMB 101001	0.150368
Bacillus subtilis	RIK543	0.150605
Bacillus subtilis	RSKK 240	0.150231
Bacillus subtilis	RSKK 244	0.150393
Bacillus subtilis	SCSIO BS01	0.150351
Bacillus subtilis	SU5	0.150401
Bacillus subtilis	TISTR 008	0.150317
Bacillus subtilis	UC564	0.150384
Bacillus subtilis	UFPEDA 16	0.150427
Bacillus subtilis	W23	0.150211
Bacillus subtilis	Y101	0.150447
Bacillus subtilis	YB3001	0.150393
bacteriodes gingivalis	n.d	0.150311
Caenorhabditis	n.d	#DIV/0!
Caenorhabditis elegans	Bristol isolate N2	#DIV/0!
Caenorhabditis elegans	Bristol N12	#DIV/0!
Caenorhabditis elegans	Bristol N2	#DIV/0!
Caenorhabditis elegans	CL4176	#DIV/0!
Caenorhabditis elegans	n.d	#DIV/0!
Caenorhabditis elegans	N2	#DIV/0!
Caenorhabditis elegans	N2 Bristol	#DIV/0!
Caenorhabditis elegans	NL5901	#DIV/0!
Campylobacter jejuni	ATCC33291	0.150298
Campylobacter jejuni	ATCC33560	0.1504
Campylobacter jejuni	DC1	0.150455
Campylobacter jejuni	DC10	0.150455
Campylobacter jejuni	DC11	0.150455
Campylobacter jejuni	DC12	0.150455
Campylobacter jejuni	DC13	0.150455
Campylobacter jejuni	DC14	0.150455
Campylobacter jejuni	DC15	0.150455
Campylobacter jejuni	DC16	0.150455
Campylobacter jejuni	DC17	0.150455
Campylobacter jejuni	DC18	0.150455
Campylobacter jejuni	DC19	0.150455
Campylobacter jejuni	DC2	0.150455
Campylobacter jejuni	DC20	0.150455
Campylobacter jejuni	DC21	0.150455
Campylobacter jejuni	DC22	0.150455
Campylobacter jejuni	DC23	0.150455
Campylobacter jejuni	DC24	0.150455
Campylobacter jejuni	DC25	0.150455
Campylobacter jejuni	DC26	0.150455
Campylobacter jejuni	DC27	0.150455
Campylobacter jejuni	DC28	0.150455
Campylobacter jejuni	DC29	0.150455
Campylobacter jejuni	DC3	0.150455
Campylobacter jejuni	DC30	0.150455
Campylobacter jejuni	DC31	0.150455
Campylobacter jejuni	DC32	0.150455
Campylobacter jejuni	DC33	0.150455
Campylobacter jejuni	DC34	0.150455
Campylobacter jejuni	DC35	0.150455
Campylobacter jejuni	DC36	0.150455
Campylobacter jejuni	DC37	0.150455
Campylobacter jejuni	DC38	0.150455
Campylobacter jejuni	DC39	0.150455
Campylobacter jejuni	DC4	0.150455
Campylobacter jejuni	DC5	0.150455
Campylobacter jejuni	DC6	0.150455
Campylobacter jejuni	DC7	0.150455
Campylobacter jejuni	DC8	0.150455
Campylobacter jejuni	DC9	0.150455
Campylobacter jejuni	isolate NCTC 11168	0.150559
Campylobacter jejuni	isolate P1093	0.150514
Campylobacter jejuni	isolate P1618	0.150517
Campylobacter jejuni	isolate P1650	0.150517
Campylobacter jejuni	isolate P1698	0.150517
Campylobacter jejuni	isolate P1699	0.150517
Campylobacter jejuni	isolate P1730	0.150517
Campylobacter jejuni	isolate P1962	0.150517
Campylobacter jejuni	isolate P270	0.150514
Campylobacter jejuni	isolate P285	0.150517
Campylobacter jejuni	isolate P286	0.150517
Campylobacter jejuni	isolate P305	0.150513
Campylobacter jejuni	isolate P316	0.150517
Campylobacter jejuni	isolate P338	0.150515
Campylobacter jejuni	isolate P790	0.150517
Campylobacter jejuni	isolate P835	0.150517
Campylobacter jejuni	isolate P843	0.150517
Campylobacter jejuni	isolate P850	0.150517
Campylobacter jejuni	isolate P854	0.150517
Campylobacter jejuni	JL276	0.150455
Campylobacter jejuni	JL277	0.150455
Campylobacter jejuni	JL278	0.150455
Campylobacter jejuni	JL279	0.150455
Campylobacter jejuni	JL283	0.150455
Campylobacter jejuni	JL284	0.150455
Campylobacter jejuni	JL285	0.150455
Campylobacter jejuni	JL286	0.150455
Campylobacter jejuni	JL287	0.150455
Campylobacter jejuni	JL288	0.150455
Campylobacter jejuni	JL289	0.150455
Campylobacter jejuni	JL290	0.150455
Campylobacter jejuni	JL291	0.150455
Campylobacter jejuni	JL292	0.150455
Campylobacter jejuni	JL293	0.150455
Campylobacter jejuni	JL294	0.150455
Campylobacter jejuni	JL295	0.150455
Campylobacter jejuni	JL296	0.150455
Campylobacter jejuni	JL297	0.150455
Campylobacter jejuni	JL298	0.150455
Campylobacter jejuni	JL299	0.150455
Campylobacter jejuni	JL300	0.150455
Campylobacter jejuni	JL301	0.150455
Campylobacter jejuni	JL302	0.150455
Campylobacter jejuni	JL303	0.150455
Campylobacter jejuni	JL304	0.150455
Campylobacter jejuni	JL305	0.150455
Campylobacter jejuni	JL306	0.150455
Campylobacter jejuni	JL307	0.150455
Campylobacter jejuni	JL308	0.150455
Campylobacter jejuni	n.d	0.150481
Campylobacter jejuni	NCTC 11168	0.150506
Campylobacter jejuni	S3B	0.150455
Chlamydia trachomatis	580 serovar H	0.150466
Chlamydia trachomatis	F/70/rifR	0.150452
Chlamydia trachomatis	F/70/rifR-tetR	0.150452
Chlamydia trachomatis	Ic Cal-8 serovar D	0.150466
Chlamydia trachomatis	J/6276/oflR-rifR1	0.150452
Chlamydia trachomatis	J/6276/oflR-rifR2	0.150452
Chlamydia trachomatis	J/6276/rifR	0.150452
Chlamydia trachomatis	J/6276/tetR	0.150452
Chlamydia trachomatis	L2 serovar VR-902B	0.150393
Chlamydia trachomatis	L2/LGV/434/Bu	0.150458
Chlamydia trachomatis	L2/oflR	0.150452
Chlamydia trachomatis	L2/oflR-rifR1	0.150452
Chlamydia trachomatis	L2/oflR-rifR2	0.150452
Chlamydia trachomatis	L2/tetR1	0.150452
Chlamydia trachomatis	L2/tetR13	0.150452
Chlamydia trachomatis	L2AZM#23	0.150458
Chlamydia trachomatis	L2AZM#31	0.150458
Chlamydia trachomatis	n.d	0.15043
Chlamydia trachomatis	Nigg	0.150527
Chlamydia trachomatis	serovar A	0.150306
Chlamydia trachomatis	serovar D	0.150427
Chlamydia trachomatis	serovar E	0.150463
Chlamydia trachomatis	serovar F	0.150466
Chlamydia trachomatis	serovar G	0.150466
Chlamydia trachomatis	serovar H	0.150466
Chlamydia trachomatis	serovar I	0.150466
Chlamydia trachomatis	serovar J	0.150466
Chlamydia trachomatis	serovar K	0.150466
Chlamydia trachomatis	serovar L2	0.150458
Chlamydia trachomatis	serovar LGV-L2	0.150336
Clostridium acetobutylicum	n.d	0.150483
e. coli strain a3228	n.d	0.150462
e.faecali	n.d	0.15044
e.faecalis strain 29212	n.d	0.150532
Emericella nidulans	ATCC96921	#DIV/0!
Emericella nidulans	isolate 00-202661	#DIV/0!
Emericella nidulans	isolate 05-326-1785	#DIV/0!
Emericella nidulans	n.d	#DIV/0!
Emericella nidulans	NBRC 33017	#DIV/0!
Enterobacter faecalis	n.d	0.150474
enterobacteriaceae faecalis	n.d	0.150421
Enterococcus faecalis	1	0.150343
Enterococcus faecalis	6	0.150428
Enterococcus faecalis	7	0.150471
Enterococcus faecalis	10	0.150519
Enterococcus faecalis	20	0.150519
Enterococcus faecalis	99	0.150356
Enterococcus faecalis	10541	0.15054
Enterococcus faecalis	13773	0.150433
Enterococcus faecalis	19433	0.150347
Enterococcus faecalis	20688	0.15051
Enterococcus faecalis	29212	0.150393
Enterococcus faecalis	43109	0.150459
Enterococcus faecalis	43114	0.150439
Enterococcus faecalis	43140	0.150459
Enterococcus faecalis	43145	0.150439
Enterococcus faecalis	43173	0.150447
Enterococcus faecalis	43230	0.150413
Enterococcus faecalis	43232	0.150386
Enterococcus faecalis	43234	0.150435
Enterococcus faecalis	43261	0.150413
Enterococcus faecalis	43291	0.150413
Enterococcus faecalis	43321	0.150453
Enterococcus faecalis	43352	0.150386
Enterococcus faecalis	43381	0.150447
Enterococcus faecalis	43442	0.150447
Enterococcus faecalis	51299	0.150364
Enterococcus faecalis	609230	0.150407
Enterococcus faecalis	700802	0.150364
Enterococcus faecalis	1058946	0.150478
Enterococcus faecalis	03A1128	0.150483
Enterococcus faecalis	03B1069	0.150442
Enterococcus faecalis	061-6556A	0.150369
Enterococcus faecalis	067-6633A	0.150369
Enterococcus faecalis	1528 R10	0.150435
Enterococcus faecalis	1528 VRE	0.150409
Enterococcus faecalis	1780065 B-B	0.150516
Enterococcus faecalis	2215767-10 B-S	0.150464
Enterococcus faecalis	2215770 B-T	0.150568
Enterococcus faecalis	2297262-10 B-V	0.150464
Enterococcus faecalis	26A36	0.15049
Enterococcus faecalis	A5962	0.150442
Enterococcus faecalis	A6343	0.150442
Enterococcus faecalis	A6350	0.150442
Enterococcus faecalis	A7789	0.150442
Enterococcus faecalis	AIS2007003	0.150513
Enterococcus faecalis	ARC 1618	0.150333
Enterococcus faecalis	ARC1618	0.150414
Enterococcus faecalis	ATCC103 29212	0.150507
Enterococcus faecalis	ATCC10541	0.150319
Enterococcus faecalis	ATCC11775	0.150692
Enterococcus faecalis	ATCC1299	0.150699
Enterococcus faecalis	ATCC14506	0.150373
Enterococcus faecalis	ATCC19433	0.150372
Enterococcus faecalis	ATCC19434	0.150604
Enterococcus faecalis	ATCC23212	0.15042
Enterococcus faecalis	ATCC25912	0.150332
Enterococcus faecalis	ATCC25923	0.150436
Enterococcus faecalis	ATCC27275	0.150298
Enterococcus faecalis	ATCC29122	0.150485
Enterococcus faecalis	ATCC29212	0.150415
Enterococcus faecalis	ATCC29212 MB	0.150444
Enterococcus faecalis	ATCC29212-P5	0.150442
Enterococcus faecalis	ATCC29213	0.150452
Enterococcus faecalis	ATCC3186	0.150427
Enterococcus faecalis	ATCC33186	0.150374
Enterococcus faecalis	ATCC35550	0.150409
Enterococcus faecalis	ATCC4083	0.150476
Enterococcus faecalis	ATCC47077	0.15041
Enterococcus faecalis	ATCC49532	0.150427
Enterococcus faecalis	ATCC51299	0.150401
Enterococcus faecalis	ATCC51559	0.150283
Enterococcus faecalis	ATCC51575	0.150355
Enterococcus faecalis	ATCC700221	0.150499
Enterococcus faecalis	ATCC700802	0.150419
Enterococcus faecalis	ATCC7080	0.150445
Enterococcus faecalis	ATCC8043	0.150467
Enterococcus faecalis	ATCC9790	0.150389
Enterococcus faecalis	B0542	0.150466
Enterococcus faecalis	C474	0.150442
Enterococcus faecalis	C600::933W	0.150496
Enterococcus faecalis	C625	0.150449
Enterococcus faecalis	CCM 4224	0.150419
Enterococcus faecalis	CECT 481	0.150361
Enterococcus faecalis	CIP 103214	0.150424
Enterococcus faecalis	CIP 104676	0.150424
Enterococcus faecalis	CIP 186	0.150465
Enterococcus faecalis	CKU-17	0.150415
Enterococcus faecalis	CL 8516	0.150484
Enterococcus faecalis	CL5246	0.150466
Enterococcus faecalis	CL8516	0.150419
Enterococcus faecalis	Cytox (pr1)	0.150519
Enterococcus faecalis	DS16	0.150404
Enterococcus faecalis	DSM 2570	0.150363
Enterococcus faecalis	E415	0.150507
Enterococcus faecalis	EF 12704	0.150495
Enterococcus faecalis	EF NJ1	0.150495
Enterococcus faecalis	Ef1497	0.150478
Enterococcus faecalis	EFL1004	0.150446
Enterococcus faecalis	EFS 007	0.150461
Enterococcus faecalis	F118	0.150364
Enterococcus faecalis	Finland 3	0.150466
Enterococcus faecalis	GC 2242	0.15032
Enterococcus faecalis	GC 4555	0.150304
Enterococcus faecalis	GMCH/B0091	0.150453
Enterococcus faecalis	GMCH/R-Gen011	0.150453
Enterococcus faecalis	H.C. 21752	0.150414
Enterococcus faecalis	H.C. 21944	0.150414
Enterococcus faecalis	H.C. 24708	0.150414
Enterococcus faecalis	H.C. 24962	0.150414
Enterococcus faecalis	HH 34358	0.150467
Enterococcus faecalis	HH22	0.15062
Enterococcus faecalis	HIP14333	0.150513
Enterococcus faecalis	HIP15179	0.150513
Enterococcus faecalis	I	0.150447
Enterococcus faecalis	isolate 1	0.150459
Enterococcus faecalis	isolate 103	0.150463
Enterococcus faecalis	isolate 11	0.150383
Enterococcus faecalis	isolate 12	0.150383
Enterococcus faecalis	isolate 13	0.150383
Enterococcus faecalis	isolate 159	0.150463
Enterococcus faecalis	isolate 21/235	0.150478
Enterococcus faecalis	isolate 22/203	0.150478
Enterococcus faecalis	isolate 22626	0.150478
Enterococcus faecalis	isolate 27728	0.150478
Enterococcus faecalis	isolate 29212	0.150388
Enterococcus faecalis	isolate 387702	0.150478
Enterococcus faecalis	isolate 5642	0.150478
Enterococcus faecalis	isolate 5648	0.150478
Enterococcus faecalis	isolate 5814	0.150478
Enterococcus faecalis	isolate 6093	0.150478
Enterococcus faecalis	isolate 7077	0.150478
Enterococcus faecalis	isolate 7079	0.150478
Enterococcus faecalis	isolate 7670	0.150478
Enterococcus faecalis	isolate 7846	0.150478
Enterococcus faecalis	isolate EFL 4041	0.150449
Enterococcus faecalis	isolate F177	0.150375
Enterococcus faecalis	isolate F217	0.150375
Enterococcus faecalis	isolate F317	0.150375
Enterococcus faecalis	isolate HS05417	0.150472
Enterococcus faecalis	isolate HS05446	0.150472
Enterococcus faecalis	isolate HS06188	0.150472
Enterococcus faecalis	isolate HS0649	0.150472
Enterococcus faecalis	isolate HS0661	0.150472
Enterococcus faecalis	isolate HS07261	0.150472
Enterococcus faecalis	isolate HS0761	0.150472
Enterococcus faecalis	isolate HS08257	0.150472
Enterococcus faecalis	isolate HS08369	0.150472
Enterococcus faecalis	isolate HS0847	0.150472
Enterococcus faecalis	isolate L559	0.150251
Enterococcus faecalis	isolate L560	0.150251
Enterococcus faecalis	J 14365/08	0.150395
Enterococcus faecalis	JH2-2	0.150487
Enterococcus faecalis	JH2-2 recA	0.150478
Enterococcus faecalis	KCTC 2011	0.150444
Enterococcus faecalis	L2	0.150471
Enterococcus faecalis	LCB0005	0.150361
Enterococcus faecalis	LCB0006	0.150361
Enterococcus faecalis	LCB0007	0.150361
Enterococcus faecalis	M15	0.150482
Enterococcus faecalis	MGH2	0.150425
Enterococcus faecalis	MGH-2	0.150405
Enterococcus faecalis	MGH-2 EF1-1	0.150457
Enterococcus faecalis	MMH594	0.15034
Enterococcus faecalis	MMX 101	0.150478
Enterococcus faecalis	MMX 202	0.150478
Enterococcus faecalis	MMX 486	0.150478
Enterococcus faecalis	MTCC 1936	0.150496
Enterococcus faecalis	MTCC 3382	0.150368
Enterococcus faecalis	MTCC 439	0.150417
Enterococcus faecalis	MTCC439	0.150474
Enterococcus faecalis	MTCCB 1652	0.150471
Enterococcus faecalis	MYC5165	0.150334
Enterococcus faecalis	n.d	0.150427
Enterococcus faecalis	N491	0.150424
Enterococcus faecalis	N518	0.150424
Enterococcus faecalis	N520	0.150424
Enterococcus faecalis	NBRC 100480	0.150431
Enterococcus faecalis	NCIM 2921	0.150519
Enterococcus faecalis	NCTC 12201 (VanA)	0.150398
Enterococcus faecalis	NCTC 12697	0.150442
Enterococcus faecalis	NCTC 6013	0.150389
Enterococcus faecalis	NCTC 775	0.150354
Enterococcus faecalis	NKH1	0.150567
Enterococcus faecalis	NKH10	0.150567
Enterococcus faecalis	NKH11	0.150567
Enterococcus faecalis	NKH12	0.150567
Enterococcus faecalis	NKH13	0.150567
Enterococcus faecalis	NKH14	0.150567
Enterococcus faecalis	NKH15	0.150567
Enterococcus faecalis	NKH16	0.150567
Enterococcus faecalis	NKH17	0.150567
Enterococcus faecalis	NKH18	0.150567
Enterococcus faecalis	NKH2	0.150567
Enterococcus faecalis	NKH3	0.150567
Enterococcus faecalis	NKH4	0.150567
Enterococcus faecalis	NKH5	0.150567
Enterococcus faecalis	NKH6	0.150567
Enterococcus faecalis	NKH7	0.150567
Enterococcus faecalis	NKH8	0.150567
Enterococcus faecalis	NKH9	0.150567
Enterococcus faecalis	No. 8043-2	0.150296
Enterococcus faecalis	NR698	0.150344
Enterococcus faecalis	OG1RF	0.150296
Enterococcus faecalis	OGIX	0.150401
Enterococcus faecalis	P1377	0.150502
Enterococcus faecalis	P5	0.150449
Enterococcus faecalis	PU43	0.150387
Enterococcus faecalis	R6512	0.150452
Enterococcus faecalis	RCMB 010068	0.150421
Enterococcus faecalis	serotype 19F	0.150471
Enterococcus faecalis	serotype 3	0.150471
Enterococcus faecalis	serotype 35B	0.150471
Enterococcus faecalis	serotype 6A/C	0.150471
Enterococcus faecalis	SR1004	0.150483
Enterococcus faecalis	SR7914	0.150539
Enterococcus faecalis	TISTR459	0.150393
Enterococcus faecalis	U503	0.150367
Enterococcus faecalis	u810	0.150482
Enterococcus faecalis	UC9217	0.150499
Enterococcus faecalis	UCN41	0.150496
Enterococcus faecalis	UFPEDA 138	0.150414
Enterococcus faecalis	UW 2689	0.150425
Enterococcus faecalis	VRE	0.150359
Enterococcus faecalis	VRE-309	0.15041
Enterococcus faecalis	W4138	0.150452
Enterococcus faecalis	Who-185	0.150441
Enterococcus faecalis	XL1	0.1505
Enterococcus faecalis ATCC 29212	n.d	0.150423
Enterococcus faecalis OG1RF	n.d	0.150351
enterococcus faecalisbacteria	n.d	0.150434
Enterococcus faecium	n.d	0.150365
enterococcus fecalis	n.d	0.150429
Escherichia coli	3	0.150343
Escherichia coli	26	0.150442
Escherichia coli	27	0.150414
Escherichia coli	60	0.150756
Escherichia coli	98	0.150429
Escherichia coli	3963	0.150454
Escherichia coli	9637	0.150447
Escherichia coli	10418	0.150487
Escherichia coli	12140	0.150496
Escherichia coli	15119	0.150495
Escherichia coli	20341	0.150495
Escherichia coli	25922	0.150514
Escherichia coli	34943	0.150521
Escherichia coli	35218	0.150485
Escherichia coli	41974	0.150452
Escherichia coli	42339	0.150447
Escherichia coli	43109	0.150495
Escherichia coli	43110	0.150457
Escherichia coli	43112	0.150454
Escherichia coli	43114	0.150437
Escherichia coli	43140	0.150457
Escherichia coli	43141	0.15046
Escherichia coli	43143	0.150452
Escherichia coli	43145	0.150437
Escherichia coli	43168	0.150456
Escherichia coli	43169	0.150458
Escherichia coli	43171	0.150452
Escherichia coli	43200	0.150463
Escherichia coli	44075	0.150518
Escherichia coli	44409	0.150445
Escherichia coli	44774	0.150449
Escherichia coli	(DE3)pLysS	0.150745
Escherichia coli	(Migula) Castellani and Chalmers ATCC25922	0.150485
Escherichia coli	03-8748TC1	0.150558
Escherichia coli	05-9280TC1	0.150558
Escherichia coli	06-6550TC1	0.150558
Escherichia coli	06AB003	0.150347
Escherichia coli	06CEB6542SALTC1	0.150558
Escherichia coli	07-819TC1	0.150558
Escherichia coli	08-1537TC1	0.150558
Escherichia coli	08-2712TC1	0.150558
Escherichia coli	08-843TC1	0.150558
Escherichia coli	1527-08	0.150756
Escherichia coli	1821386 B-D	0.150464
Escherichia coli	1889647 B-H	0.150464
Escherichia coli	1949825 B-K	0.150464
Escherichia coli	A	0.150523
Escherichia coli	A15	0.150535
Escherichia coli	AB1157	0.150462
Escherichia coli	AB14156	0.150558
Escherichia coli	AB734	0.15038
Escherichia coli	AG100	0.150489
Escherichia coli	AG100A	0.150431
Escherichia coli	AG100AX	0.150434
Escherichia coli	AG102	0.150508
Escherichia coli	AG102MB	0.150498
Escherichia coli	AMG1	0.150485
Escherichia coli	ANS1	0.150321
Escherichia coli	ARC523	0.150421
Escherichia coli	ARC523 W3110	0.150485
Escherichia coli	ARC524	0.150421
Escherichia coli	ARC524 W3110	0.150485
Escherichia coli	AS19	0.150403
Escherichia coli	AS226	0.150525
Escherichia coli	ATCC10145	0.150411
Escherichia coli	ATCC10231	0.150374
Escherichia coli	ATCC10536	0.150402
Escherichia coli	ATCC10538	0.150473
Escherichia coli	ATCC107 25922	0.150507
Escherichia coli	ATCC10799	0.150366
Escherichia coli	ATCC11103	0.150485
Escherichia coli	ATCC11229	0.150401
Escherichia coli	ATCC11230	0.1504
Escherichia coli	ATCC11303	0.150522
Escherichia coli	ATCC11775	0.150378
Escherichia coli	ATCC1240	0.150756
Escherichia coli	ATCC12435	0.150283
Escherichia coli	ATCC1280	0.150615
Escherichia coli	ATCC14169	0.150428
Escherichia coli	ATCC2343	0.150462
Escherichia coli	ATCC23566	0.150392
Escherichia coli	ATCC23999	0.150414
Escherichia coli	ATCC24922	0.150462
Escherichia coli	ATCC2522	0.150462
Escherichia coli	ATCC25835	0.150258
Escherichia coli	ATCC25922	0.150415
Escherichia coli	ATCC25922 isolate 107	0.1505
Escherichia coli	ATCC25922/35128	0.150756
Escherichia coli	ATCC25922; Type strain	0.150396
Escherichia coli	ATCC25922-1	0.150495
Escherichia coli	ATCC27856	0.150485
Escherichia coli	ATCC29213	0.150392
Escherichia coli	ATCC29425	0.150438
Escherichia coli	ATCC29522	0.150394
Escherichia coli	ATCC33291	0.15051
Escherichia coli	ATCC35049	0.150336
Escherichia coli	ATCC35210	0.150389
Escherichia coli	ATCC35218	0.15039
Escherichia coli	ATCC35270	0.150405
Escherichia coli	ATCC35333	0.150283
Escherichia coli	ATCC377/79	0.150325
Escherichia coli	ATCC4230	0.150302
Escherichia coli	ATCC47076	0.150531
Escherichia coli	ATCC53868	0.150389
Escherichia coli	ATCC6174	0.150562
Escherichia coli	ATCC700927	0.150493
Escherichia coli	ATCC8739	0.150422
Escherichia coli	ATCC9637	0.15038
Escherichia coli	ATCCBAA-198	0.150349
Escherichia coli	ATCCBAA-201	0.150794
Escherichia coli	ATCC-25922	0.150462
Escherichia coli	ATTC 25922	0.150381
Escherichia coli	ATTC 25923	0.150328
Escherichia coli	ATTC-25922	0.150437
Escherichia coli	AUMC B-53	0.150485
Escherichia coli	AY1297	0.150433
Escherichia coli	B/r	0.150546
Escherichia coli	B1LK0A	0.150527
Escherichia coli	B3704	0.150485
Escherichia coli	B-906	0.150332
Escherichia coli	BCG-Russia	0.150518
Escherichia coli	BER1	0.150525
Escherichia coli	BicA	0.15048
Escherichia coli	BL21 (DE3)	0.15054
Escherichia coli	BW251113	0.150357
Escherichia coli	BW25113	0.150543
Escherichia coli	BW25113 delta tolC	0.150462
Escherichia coli	BW25116	0.150411
Escherichia coli	BW5328/pAH69	0.150337
Escherichia coli	BW54	0.150373
Escherichia coli	BW55	0.150372
Escherichia coli	C600	0.150529
Escherichia coli	C600 2878	0.150519
Escherichia coli	C600 D83-T	0.150462
Escherichia coli	C600 G062-T	0.150462
Escherichia coli	C600 G262-T	0.150462
Escherichia coli	C600 G375-T	0.150462
Escherichia coli	C600 SP8-T	0.150462
Escherichia coli	C600 ST2-T	0.150462
Escherichia coli	C600 SW8-T	0.150462
Escherichia coli	C600 W191-T	0.150462
Escherichia coli	C600 W245-T	0.150462
Escherichia coli	C600 W281-T	0.150462
Escherichia coli	C600 W322-T	0.150462
Escherichia coli	C600 X1B1-T	0.150462
Escherichia coli	C600 XT11-T	0.150462
Escherichia coli	C600::933W	0.150462
Escherichia coli	C600::H19B	0.150462
Escherichia coli	C921-61	0.150588
Escherichia coli	CAG12184	0.150396
Escherichia coli	CAG1284	0.150475
Escherichia coli	CAN-ICU 63074	0.150562
Escherichia coli	CCARM 1356	0.150384
Escherichia coli	CCARM 1924	0.150355
Escherichia coli	CCM 4517	0.150338
Escherichia coli	CF102	0.150523
Escherichia coli	CFT703-RR	0.150462
Escherichia coli	CGMCC 1.1571	0.150348
Escherichia coli	CGMCC 1.1574	0.150536
Escherichia coli	CGMCC1.1571	0.150291
Escherichia coli	CH10	0.150337
Escherichia coli	CIP 53126	0.150357
Escherichia coli	CIP 54.8	0.150231
Escherichia coli	CMR300	0.150485
Escherichia coli	COP	0.15054
Escherichia coli	CR1000	0.150485
Escherichia coli	CR2000	0.150485
Escherichia coli	CSH-2	0.150727
Escherichia coli	CSH26RifR	0.150437
Escherichia coli	CU164A	0.150527
Escherichia coli	D21	0.150636
Escherichia coli	D22	0.150478
Escherichia coli	D23	0.150462
Escherichia coli	D3	0.150462
Escherichia coli	D40	0.150462
Escherichia coli	D47	0.150462
Escherichia coli	D55	0.150462
Escherichia coli	D57	0.150462
Escherichia coli	D61	0.150462
Escherichia coli	D76	0.150462
Escherichia coli	D77	0.150462
Escherichia coli	D81	0.150462
Escherichia coli	D86	0.150462
Escherichia coli	D87	0.150462
Escherichia coli	DC0	0.150438
Escherichia coli	DC2	0.150433
Escherichia coli	DH10B	0.150508
Escherichia coli	DH5 alpha	0.150511
Escherichia coli	DH5[alpha]	0.150515
Escherichia coli	DH52	0.150357
Escherichia coli	DH5alpha	0.150538
Escherichia coli	DH5-alpha	0.150535
Escherichia coli	DH5alpha 2878	0.150519
Escherichia coli	DIH-1	0.150522
Escherichia coli	DK	0.15035
Escherichia coli	DK/2058G	0.150354
Escherichia coli	DK/pKK3535	0.150353
Escherichia coli	DM4100	0.150442
Escherichia coli	DM49	0.150462
Escherichia coli	DSM11250 (PCM2560, NTCC 10538)	0.150756
Escherichia coli	Du19	0.150502
Escherichia coli	Du27	0.150462
Escherichia coli	Du6	0.150462
Escherichia coli	Du89	0.150462
Escherichia coli	E341	0.150464
Escherichia coli	E342	0.150464
Escherichia coli	E344	0.15051
Escherichia coli	E345	0.15051
Escherichia coli	E346	0.150505
Escherichia coli	E347	0.15051
Escherichia coli	E348	0.15051
Escherichia coli	E350	0.15051
Escherichia coli	E408	0.15051
Escherichia coli	E409	0.15051
Escherichia coli	E412	0.15051
Escherichia coli	E415	0.15051
Escherichia coli	E424	0.150505
Escherichia coli	E425	0.150505
Escherichia coli	E430	0.15051
Escherichia coli	E437	0.150505
Escherichia coli	E438	0.150464
Escherichia coli	E439	0.150464
Escherichia coli	E446	0.150508
Escherichia coli	E450	0.15051
Escherichia coli	E451	0.15051
Escherichia coli	E452	0.15051
Escherichia coli	E456	0.15051
Escherichia coli	E458	0.15051
Escherichia coli	E459	0.15051
Escherichia coli	E460	0.15051
Escherichia coli	E465	0.15051
Escherichia coli	E483	0.15051
Escherichia coli	E484	0.15051
Escherichia coli	EC1007	0.150527
Escherichia coli	Ec158	0.150521
Escherichia coli	Ec221	0.150521
Escherichia coli	EC2880	0.150373
Escherichia coli	EC600	0.150522
Escherichia coli	Ec9381	0.150521
Escherichia coli	ECM116	0.150411
Escherichia coli	ECM1642	0.150411
Escherichia coli	Eco523	0.15041
Escherichia coli	EIR2a	0.150503
Escherichia coli	EIR2b	0.150503
Escherichia coli	EIR4a	0.150503
Escherichia coli	EIR4b	0.150503
Escherichia coli	EIR8a	0.150503
Escherichia coli	EMBLC-1	0.150449
Escherichia coli	EMR2a	0.150503
Escherichia coli	EPI300	0.150558
Escherichia coli	ERR2a	0.150503
Escherichia coli	ERR2b	0.150503
Escherichia coli	ERR4a	0.150503
Escherichia coli	ERR8a	0.150503
Escherichia coli	ES100	0.15038
Escherichia coli	ESBL 3904	0.15042
Escherichia coli	ESBL 3984	0.15042
Escherichia coli	F-50	0.150462
Escherichia coli	FJ3	0.150515
Escherichia coli	FJ3T	0.150502
Escherichia coli	FMV5825	0.150529
Escherichia coli	FNSST 982	0.150434
Escherichia coli	GB20	0.150558
Escherichia coli	GC 4560	0.15036
Escherichia coli	GD100	0.150728
Escherichia coli	GD106	0.150684
Escherichia coli	GD107	0.150684
Escherichia coli	GD108	0.150684
Escherichia coli	GeneHogs	0.150507
Escherichia coli	GM2995	0.150558
Escherichia coli	GP4	0.15054
Escherichia coli	GW1000	0.150462
Escherichia coli	HB101	0.150517
Escherichia coli	HB101/pPAP5	0.150364
Escherichia coli	HB4	0.150524
Escherichia coli	HH 33779	0.150495
Escherichia coli	HM489	0.150519
Escherichia coli	HN1157	0.150492
Escherichia coli	HN818	0.150433
Escherichia coli	HNCE4	0.150494
Escherichia coli	HS294	0.150379
Escherichia coli	HX74	0.150522
Escherichia coli	HX74T	0.15051
Escherichia coli	IFO 3301	0.150396
Escherichia coli	imp-4213	0.150337
Escherichia coli	imp4213::Tn10	0.150419
Escherichia coli	INSRA4590	0.150527
Escherichia coli	Irk1224	0.150558
Escherichia coli	Irk2320	0.150558
Escherichia coli	Irk2322	0.150558
Escherichia coli	isolate 1	0.150452
Escherichia coli	isolate 100	0.150525
Escherichia coli	isolate 11	0.150462
Escherichia coli	isolate 12-1	0.150463
Escherichia coli	isolate 12-2	0.150462
Escherichia coli	isolate 12-4	0.150463
Escherichia coli	isolate 12-5	0.150462
Escherichia coli	isolate 13 V676803	0.150199
Escherichia coli	isolate 157	0.150522
Escherichia coli	isolate 157T	0.150502
Escherichia coli	isolate 16	0.150525
Escherichia coli	isolate 1679	0.150522
Escherichia coli	isolate 1679T	0.150502
Escherichia coli	isolate 17	0.15049
Escherichia coli	isolate 2	0.150452
Escherichia coli	isolate 235	0.150498
Escherichia coli	isolate 237	0.150498
Escherichia coli	isolate 271	0.150522
Escherichia coli	isolate 3	0.150488
Escherichia coli	isolate 32	0.150541
Escherichia coli	isolate 329	0.150522
Escherichia coli	isolate 329T	0.150502
Escherichia coli	isolate 339	0.150522
Escherichia coli	isolate 339T	0.150502
Escherichia coli	isolate 36	0.150541
Escherichia coli	isolate 360	0.150522
Escherichia coli	isolate 360T	0.150502
Escherichia coli	isolate 386	0.150522
Escherichia coli	isolate 386T	0.150502
Escherichia coli	isolate 4	0.150462
Escherichia coli	isolate 4009273	0.150558
Escherichia coli	isolate 4024	0.150498
Escherichia coli	isolate 44	0.15044
Escherichia coli	isolate 48	0.15049
Escherichia coli	isolate 49	0.150541
Escherichia coli	isolate 5000869	0.150558
Escherichia coli	isolate 540	0.150522
Escherichia coli	isolate 5401	0.150505
Escherichia coli	isolate 5411	0.150505
Escherichia coli	isolate 543	0.150522
Escherichia coli	isolate 543T	0.150502
Escherichia coli	isolate 544	0.150522
Escherichia coli	isolate 547	0.150522
Escherichia coli	isolate 547T	0.150502
Escherichia coli	isolate 5-65	0.150462
Escherichia coli	isolate 7001178	0.150558
Escherichia coli	isolate 7008153	0.150558
Escherichia coli	isolate 7008211	0.150558
Escherichia coli	isolate 7008710	0.150558
Escherichia coli	isolate 7010738	0.150558
Escherichia coli	isolate 7014517	0.150558
Escherichia coli	isolate 8009162	0.150558
Escherichia coli	isolate 8009389	0.150558
Escherichia coli	isolate 8009989	0.150558
Escherichia coli	isolate 86	0.150541
Escherichia coli	isolate A	0.150517
Escherichia coli	isolate ARL04-413	0.150535
Escherichia coli	isolate ARL05-705	0.150535
Escherichia coli	isolate ARL05-909	0.150535
Escherichia coli	isolate ARL06-39	0.150535
Escherichia coli	isolate ARS3	0.150727
Escherichia coli	isolate BU-20287	0.150519
Escherichia coli	isolate C1	0.150463
Escherichia coli	isolate C14-9	0.150463
Escherichia coli	isolate CAN-ICU 61714	0.150704
Escherichia coli	isolate CAN-ICU 63074	0.150704
Escherichia coli	isolate CKP048	0.15051
Escherichia coli	isolate CQ1	0.15045
Escherichia coli	isolate CQ10	0.15045
Escherichia coli	isolate CQ12	0.15045
Escherichia coli	isolate CQ13	0.15045
Escherichia coli	isolate CQ14	0.15045
Escherichia coli	isolate CQ15	0.15045
Escherichia coli	isolate CQ16	0.15045
Escherichia coli	isolate CQ18	0.15045
Escherichia coli	isolate CQ19	0.15045
Escherichia coli	isolate CQ2	0.15045
Escherichia coli	isolate CQ20	0.15045
Escherichia coli	isolate CQ22	0.15045
Escherichia coli	isolate CQ26	0.15045
Escherichia coli	isolate CQ4	0.15045
Escherichia coli	isolate CQ5	0.15045
Escherichia coli	isolate CQ6	0.15045
Escherichia coli	isolate CQ7	0.15045
Escherichia coli	isolate CUMC174	0.150558
Escherichia coli	isolate CUMC176	0.150558
Escherichia coli	isolate CUMC180	0.150558
Escherichia coli	isolate CUMC181	0.150558
Escherichia coli	isolate CUMC190	0.150558
Escherichia coli	isolate CUMC192	0.150558
Escherichia coli	isolate CUMC201	0.150558
Escherichia coli	isolate CUMC203	0.150558
Escherichia coli	isolate CUMC204	0.150558
Escherichia coli	isolate CUMC214	0.150558
Escherichia coli	isolate CUMC215	0.150558
Escherichia coli	isolate CUMC223	0.150558
Escherichia coli	isolate CUMC224	0.150558
Escherichia coli	isolate CUMC225	0.150558
Escherichia coli	isolate CUMC233	0.150558
Escherichia coli	isolate CUMC241	0.150558
Escherichia coli	isolate CUMC243	0.150558
Escherichia coli	isolate CUMC244	0.150558
Escherichia coli	isolate CUMC245	0.150558
Escherichia coli	isolate CUMC248	0.150558
Escherichia coli	isolate DH10B	0.15054
Escherichia coli	isolate E1	0.150522
Escherichia coli	isolate EC155	0.1505
Escherichia coli	isolate Ec158	0.150521
Escherichia coli	isolate Ec211	0.150521
Escherichia coli	isolate Ec221	0.150521
Escherichia coli	isolate Ec9381	0.150521
Escherichia coli	isolate GZ1	0.15045
Escherichia coli	isolate GZ10	0.15045
Escherichia coli	isolate GZ11	0.15045
Escherichia coli	isolate GZ12	0.15045
Escherichia coli	isolate GZ13	0.15045
Escherichia coli	isolate GZ14	0.15045
Escherichia coli	isolate GZ15	0.15045
Escherichia coli	isolate GZ16	0.15045
Escherichia coli	isolate GZ2	0.15045
Escherichia coli	isolate GZ3	0.15045
Escherichia coli	isolate GZ4	0.15045
Escherichia coli	isolate GZ5	0.15045
Escherichia coli	isolate GZ6	0.15045
Escherichia coli	isolate GZ7	0.15045
Escherichia coli	isolate GZ8	0.15045
Escherichia coli	isolate GZ9	0.15045
Escherichia coli	isolate HM605	0.150462
Escherichia coli	isolate J53	0.150517
Escherichia coli	isolate M1	0.150463
Escherichia coli	isolate M2	0.150457
Escherichia coli	isolate M3	0.150463
Escherichia coli	isolate M66-6	0.150463
Escherichia coli	isolate O157	0.150581
Escherichia coli	isolate P1618	0.150558
Escherichia coli	isolate Pae-beta-26	0.150756
Escherichia coli	isolate PA-SL2	0.150485
Escherichia coli	isolate Spec. 210	0.15044
Escherichia coli	isolate TOP10	0.150517
Escherichia coli	isolate V1	0.150463
Escherichia coli	isolate V32-1	0.150463
Escherichia coli	isolate V6-9	0.150463
Escherichia coli	isolate Y1	0.150463
Escherichia coli	isolate Y2	0.150463
Escherichia coli	isolate Y3	0.150463
Escherichia coli	isolate Y6-7	0.150463
Escherichia coli	isolate Z1	0.150541
Escherichia coli	J5	0.150558
Escherichia coli	J53	0.150505
Escherichia coli	J-53	0.150478
Escherichia coli	J53 AzR	0.150462
Escherichia coli	J53 SXT1	0.150464
Escherichia coli	J53 SXT13-1	0.150462
Escherichia coli	J53-2	0.150546
Escherichia coli	J53-AzR	0.150526
Escherichia coli	JL286	0.150433
Escherichia coli	JL287	0.150452
Escherichia coli	JM 109	0.150381
Escherichia coli	JM101Tr	0.150475
Escherichia coli	JM109	0.150427
Escherichia coli	JM83	0.150617
Escherichia coli	JS10	0.150503
Escherichia coli	JS4	0.150503
Escherichia coli	JW0117-1	0.150684
Escherichia coli	JW2914-1	0.150684
Escherichia coli	JW2956-1	0.150684
Escherichia coli	JW5503-1	0.150337
Escherichia coli	K1	0.150756
Escherichia coli	K10	0.150588
Escherichia coli	K12	0.150532
Escherichia coli	K12 MG1655	0.150614
Escherichia coli	K37	0.150475
Escherichia coli	K802N	0.150523
Escherichia coli	KAM3	0.150475
Escherichia coli	KAM32	0.150466
Escherichia coli	KCTC 1039	0.150558
Escherichia coli	KCTC 1682	0.150442
Escherichia coli	KCTC 1923	0.150418
Escherichia coli	KCTC 1924	0.150406
Escherichia coli	KD1397	0.150449
Escherichia coli	KD65	0.150449
Escherichia coli	KM55-68	0.150478
Escherichia coli	KM69-73	0.150478
Escherichia coli	KM74	0.150478
Escherichia coli	KM75-84	0.150478
Escherichia coli	KM85-86	0.150478
Escherichia coli	KM87-88	0.150478
Escherichia coli	KM89-94	0.150478
Escherichia coli	KY895	0.150522
Escherichia coli	L58058.1	0.150441
Escherichia coli	LCB0010	0.150359
Escherichia coli	LCB0011	0.150359
Escherichia coli	LCB0012	0.150359
Escherichia coli	Libyien	0.150523
Escherichia coli	LMP 701	0.150357
Escherichia coli	M15	0.150549
Escherichia coli	M7943-TC2	0.150513
Escherichia coli	MB 2884	0.150483
Escherichia coli	MB 5746	0.150483
Escherichia coli	MB2482	0.150525
Escherichia coli	MB2884	0.150419
Escherichia coli	MB2964	0.150525
Escherichia coli	MB5746	0.150405
Escherichia coli	MC 1061	0.150289
Escherichia coli	MC1061	0.150588
Escherichia coli	MC4100	0.150393
Escherichia coli	MC4100A	0.150527
Escherichia coli	MEZ	0.15054
Escherichia coli	MG1655	0.150564
Escherichia coli	MI1443	0.150558
Escherichia coli	ML4901	0.150546
Escherichia coli	ML4909	0.150546
Escherichia coli	MM 294	0.150492
Escherichia coli	MRY04-1060	0.15054
Escherichia coli	MRY05-3283	0.15054
Escherichia coli	MSC07771	0.15038
Escherichia coli	MSCL 332	0.150346
Escherichia coli	MTCC 0723	0.150462
Escherichia coli	MTCC 1089	0.150387
Escherichia coli	MTCC 119	0.150485
Escherichia coli	MTCC 1563	0.150359
Escherichia coli	MTCC 1610	0.150337
Escherichia coli	MTCC 1650	0.150359
Escherichia coli	MTCC 1652	0.150405
Escherichia coli	MTCC 2622	0.150462
Escherichia coli	MTCC 2939	0.150241
Escherichia coli	MTCC 40	0.150525
Escherichia coli	MTCC 41	0.150421
Escherichia coli	MTCC 42	0.150401
Escherichia coli	MTCC 43	0.150463
Escherichia coli	MTCC 442	0.150462
Escherichia coli	MTCC 443	0.150394
Escherichia coli	MTCC 51	0.15039
Escherichia coli	MTCC 722	0.150459
Escherichia coli	MTCC 723	0.150462
Escherichia coli	MTCC 724	0.150345
Escherichia coli	MTCC 739	0.15036
Escherichia coli	MTCC 82	0.150364
Escherichia coli	MTCC-119	0.150456
Escherichia coli	MTCC1610	0.150485
Escherichia coli	MTCC-443	0.150473
Escherichia coli	MTCCB 1652	0.150434
Escherichia coli	n.d	0.150457
Escherichia coli	N10	0.150485
Escherichia coli	N43	0.150794
Escherichia coli	NB27005-CDY0039	0.1504
Escherichia coli	NCIB 86	0.150429
Escherichia coli	NCIM 2065	0.150393
Escherichia coli	NCIM 2065; ATCC8739	0.150331
Escherichia coli	NCIM 2109	0.150462
Escherichia coli	NCIM 2256	0.150423
Escherichia coli	NCIM 2666	0.150379
Escherichia coli	NCIM 2688	0.150372
Escherichia coli	NCIM 2803	0.15042
Escherichia coli	NCIM 2931	0.15032
Escherichia coli	NCIM 5051	0.15042
Escherichia coli	NCIM2065	0.150305
Escherichia coli	NCIM-2256	0.150382
Escherichia coli	NCIMB 9485	0.150323
Escherichia coli	NCTC 10416	0.150327
Escherichia coli	NCTC 10418	0.15038
Escherichia coli	NCTC 6571	0.150462
Escherichia coli	NCTC 8192	0.150499
Escherichia coli	NCTC 8196	0.150462
Escherichia coli	NEB 5-alpha	0.150523
Escherichia coli	NF-NDM-1	0.150508
Escherichia coli	NI540	0.150525
Escherichia coli	NIHJ	0.150469
Escherichia coli	NIHJ JC2	0.150471
Escherichia coli	NIHJ JC-2	0.150509
Escherichia coli	NKE126	0.150593
Escherichia coli	NKE127	0.150593
Escherichia coli	NKE128	0.150593
Escherichia coli	NKE1316	0.150593
Escherichia coli	NKE1365	0.150593
Escherichia coli	NKE1366	0.150593
Escherichia coli	NKE1367	0.150593
Escherichia coli	NKE1368	0.150593
Escherichia coli	NKE1369	0.150593
Escherichia coli	NKE154	0.150593
Escherichia coli	NKE155	0.150593
Escherichia coli	NKE156	0.150593
Escherichia coli	NKE157	0.150593
Escherichia coli	NKE158	0.150593
Escherichia coli	NKE159	0.150593
Escherichia coli	NKE160	0.150593
Escherichia coli	NKE161	0.150593
Escherichia coli	NKE96	0.150593
Escherichia coli	NKH1	0.150521
Escherichia coli	nmcA	0.150523
Escherichia coli	NO8-1503	0.150558
Escherichia coli	NorE5	0.150473
Escherichia coli	NR698	0.150392
Escherichia coli	O157	0.150462
Escherichia coli	O18:K1:H7	0.15035
Escherichia coli	OC 11732	0.150535
Escherichia coli	OC 6697	0.150535
Escherichia coli	P1	0.150462
Escherichia coli	P17	0.150462
Escherichia coli	PA11	0.150521
Escherichia coli	PAZ505H8101	0.150441
Escherichia coli	PCM 2560	0.150579
Escherichia coli	PCM 2561 (ATCC8739, DSM 1576)	0.150756
Escherichia coli	PGI/ DML02292	0.150462
Escherichia coli	PS5	0.150473
Escherichia coli	PTCC 1338	0.150454
Escherichia coli	PU101	0.150522
Escherichia coli	PU101T	0.15051
Escherichia coli	PU102	0.150522
Escherichia coli	PU102T	0.15051
Escherichia coli	PU12	0.150515
Escherichia coli	PU12T	0.150502
Escherichia coli	PU43	0.150522
Escherichia coli	PU60	0.150522
Escherichia coli	PU60T	0.15051
Escherichia coli	PU96	0.150522
Escherichia coli	R4525	0.150438
Escherichia coli	R477/100	0.150711
Escherichia coli	R477-100	0.150741
Escherichia coli	RAM1129	0.150377
Escherichia coli	RAM4100	0.150377
Escherichia coli	RCMB 103001	0.150485
Escherichia coli	Rosetta(DE3)	0.150485
Escherichia coli	RP437	0.150433
Escherichia coli	S1	0.150462
Escherichia coli	S4	0.150462
Escherichia coli	S5	0.150462
Escherichia coli	S6	0.150462
Escherichia coli	SANK 70569	0.15045
Escherichia coli	SG458	0.150473
Escherichia coli	SK&F 12140	0.150495
Escherichia coli	SKF 12140	0.150502
Escherichia coli	SKM18	0.150442
Escherichia coli	SKM9	0.150442
Escherichia coli	SM101	0.150393
Escherichia coli	SM1411	0.15038
Escherichia coli	SQ110	0.150478
Escherichia coli	SQ171	0.15035
Escherichia coli	SQ171/2058G	0.150354
Escherichia coli	SR24169	0.150513
Escherichia coli	ST131 clonal complex isolate	0.150513
Escherichia coli	T-622	0.150522
Escherichia coli	T-625	0.150522
Escherichia coli	T-781	0.150522
Escherichia coli	TA102	0.150505
Escherichia coli	TA531	0.15035
Escherichia coli	TF-KO279	0.15054
Escherichia coli	TF-KO281	0.15054
Escherichia coli	TF-KP278	0.15054
Escherichia coli	TG1	0.150445
Escherichia coli	TG2	0.150373
Escherichia coli	Ti05	0.150534
Escherichia coli	TISTR 780	0.150399
Escherichia coli	TolC	0.150332
Escherichia coli	tolC::Tn10	0.150419
Escherichia coli	TOP10	0.150499
Escherichia coli	TOP10(pNOR-1)	0.150525
Escherichia coli	Top10/isolate 25922	0.150558
Escherichia coli	Top10/isolate 7014517	0.150558
Escherichia coli	Top10/isolate 8009162	0.150558
Escherichia coli	TOP10-3963	0.150454
Escherichia coli	TOP10F'	0.150603
Escherichia coli	TP1	0.150558
Escherichia coli	TrC A	0.150546
Escherichia coli	TrC B	0.150546
Escherichia coli	TrC C	0.150546
Escherichia coli	TUM4670	0.150546
Escherichia coli	TUM4672	0.150546
Escherichia coli	U2A1051	0.150523
Escherichia coli	UAlP7	0.150475
Escherichia coli	UB1005	0.150451
Escherichia coli	UFPEDA 224	0.150586
Escherichia coli	V6311/65	0.150523
Escherichia coli	VOG	0.15054
Escherichia coli	Vogel	0.150414
Escherichia coli	W3110	0.150473
Escherichia coli	W3110PA	0.150485
Escherichia coli	W3110RL	0.150485
Escherichia coli	W4573	0.150701
Escherichia coli	WT-3-1 MB2	0.150452
Escherichia coli	X1037	0.150543
Escherichia coli	X580	0.150436
Escherichia coli	XL1	0.150647
Escherichia coli	XL-1 Blue	0.150508
Escherichia coli	XL1-Blue	0.150517
Escherichia coli	YD006	0.150521
Escherichia coli	YLS-3	0.150527
Escherichia coli	ZJ86	0.150522
Escherichia coli	ZJ86T	0.15051
Escherichia coli	ZJ87	0.150522
Escherichia coli	ZJ87T	0.15051
Escherichia coli	ZK796	0.150417
escherichia coli a 15119	n.d	0.150462
Escherichia coli ATCC 25922	n.d	0.150401
Escherichia coli ATCC 8739	n.d	0.150756
Escherichia coli BL21	n.d	0.1505
Escherichia coli BL21(DE3)	n.d	0.150514
Escherichia coli DSM 30083 = JCM 1649	n.d	0.150512
Escherichia coli HB101	n.d	0.150485
Escherichia coli W	n.d	0.150491
escherichia colin	n.d	0.150462
escherichia faecalis	n.d	0.150351
haemophiles influenzae	n.d	0.150508
Haemophilus influenzae	1	0.150386
Haemophilus influenzae	2	0.150386
Haemophilus influenzae	3	0.150386
Haemophilus influenzae	38	0.150326
Haemophilus influenzae	4437	0.150451
Haemophilus influenzae	5096	0.150458
Haemophilus influenzae	31809	0.150499
Haemophilus influenzae	49247	0.15038
Haemophilus influenzae	07O114	0.15035
Haemophilus influenzae	07O339	0.15035
Haemophilus influenzae	07O394	0.15035
Haemophilus influenzae	11P037	0.150353
Haemophilus influenzae	54A1100	0.150428
Haemophilus influenzae	A1950	0.150428
Haemophilus influenzae	A2	0.150457
Haemophilus influenzae	A921	0.150448
Haemophilus influenzae	ARC158	0.150399
Haemophilus influenzae	ARC446	0.150418
Haemophilus influenzae	ARM158	0.150441
Haemophilus influenzae	ATC 12699	0.150438
Haemophilus influenzae	ATCC10211	0.150365
Haemophilus influenzae	ATCC19418	0.150409
Haemophilus influenzae	ATCC31517	0.15044
Haemophilus influenzae	ATCC31517 MMSA	0.150394
Haemophilus influenzae	ATCC43095	0.150414
Haemophilus influenzae	ATCC49247	0.150423
Haemophilus influenzae	ATCC4927	0.150427
Haemophilus influenzae	ATCC49766	0.150446
Haemophilus influenzae	ATCC51907	0.150494
Haemophilus influenzae	ATTC 49247	0.150452
Haemophilus influenzae	B0529	0.150431
Haemophilus influenzae	DSM 10	0.15049
Haemophilus influenzae	EH001	0.150393
Haemophilus influenzae	EH002	0.150393
Haemophilus influenzae	EH003	0.150393
Haemophilus influenzae	F3	0.150494
Haemophilus influenzae	F41	0.150494
Haemophilus influenzae	F45	0.150494
Haemophilus influenzae	F47	0.150494
Haemophilus influenzae	F48	0.150494
Haemophilus influenzae	F49	0.150494
Haemophilus influenzae	F50	0.150494
Haemophilus influenzae	F52	0.150494
Haemophilus influenzae	F54	0.150494
Haemophilus influenzae	H128	0.150446
Haemophilus influenzae	H23	0.150494
Haemophilus influenzae	H62	0.150494
Haemophilus influenzae	hd2	0.150482
Haemophilus influenzae	HI-3542	0.150452
Haemophilus influenzae	HIN101	0.150457
Haemophilus influenzae	HIN102	0.150453
Haemophilus influenzae	IID983	0.150436
Haemophilus influenzae	isolate 2019	0.150452
Haemophilus influenzae	isolate 280	0.15044
Haemophilus influenzae	isolate 282	0.15044
Haemophilus influenzae	isolate 283	0.15044
Haemophilus influenzae	isolate 285	0.15044
Haemophilus influenzae	isolate 29212	0.150387
Haemophilus influenzae	isolate BB1050	0.15052
Haemophilus influenzae	isolate BB1051	0.15052
Haemophilus influenzae	isolate BB1052	0.15052
Haemophilus influenzae	isolate BB1053	0.15052
Haemophilus influenzae	isolate PA362	0.150458
Haemophilus influenzae	JPH002	0.150493
Haemophilus influenzae	JPH1306	0.150493
Haemophilus influenzae	KCTC 1923	0.150388
Haemophilus influenzae	LCB0015	0.150361
Haemophilus influenzae	Lek 93	0.150453
Haemophilus influenzae	LS2	0.150384
Haemophilus influenzae	MB 4572	0.150484
Haemophilus influenzae	MB4572	0.150413
Haemophilus influenzae	ME587	0.150405
Haemophilus influenzae	MGH-2	0.150397
Haemophilus influenzae	MSC01363	0.150512
Haemophilus influenzae	MSC01400	0.150512
Haemophilus influenzae	MSC01432	0.150512
Haemophilus influenzae	MSC01855	0.150512
Haemophilus influenzae	MSC01869	0.150512
Haemophilus influenzae	MSC02022	0.150512
Haemophilus influenzae	MSC02070	0.150512
Haemophilus influenzae	MSC02104	0.150512
Haemophilus influenzae	MSC02149	0.150512
Haemophilus influenzae	MSC06647	0.150496
Haemophilus influenzae	MSC06651	0.150478
Haemophilus influenzae	MSC06663	0.150496
Haemophilus influenzae	MSC07169	0.150512
Haemophilus influenzae	MSC07237	0.150512
Haemophilus influenzae	MSC07771	0.150512
Haemophilus influenzae	MSD2261	0.150405
Haemophilus influenzae	n.d	0.150452
Haemophilus influenzae	NB65044	0.150501
Haemophilus influenzae	OC4882	0.150327
Haemophilus influenzae	PGI/DML01744	0.150453
Haemophilus influenzae	PGI/DML01751	0.150453
Haemophilus influenzae	Q1	0.150465
Haemophilus influenzae	Rd	0.1505
Haemophilus influenzae	Rd clone	0.150503
Haemophilus influenzae	Rd KW20	0.15052
Haemophilus influenzae	RdRIF	0.150478
Haemophilus influenzae	RdRIF/MSC06647	0.15047
Haemophilus influenzae	RdRIF/MSC06651	0.15047
Haemophilus influenzae	RdRIF/MSC06663	0.15047
Haemophilus influenzae	Rv18	0.150387
Haemophilus influenzae	SR24169	0.150391
Haemophilus influenzae	SR27914	0.150483
Haemophilus influenzae	TH13	0.150386
Haemophilus influenzae	type b	0.150476
Haemophilus influenzae	UC30063	0.150499
Haemophilus influenzae	VT450-2006	0.150457
Helicobacter pylori	1	0.150464
Helicobacter pylori	2	0.150464
Helicobacter pylori	55	0.150399
Helicobacter pylori	5296.5	0.150537
Helicobacter pylori	26695	0.150462
Helicobacter pylori	41760	0.150471
Helicobacter pylori	2018-01-05	0.150471
Helicobacter pylori	2018-01-06	0.150471
Helicobacter pylori	43136	0.150471
Helicobacter pylori	43137	0.150471
Helicobacter pylori	43164	0.150471
Helicobacter pylori	43165	0.150471
Helicobacter pylori	2018-04-05	0.150471
Helicobacter pylori	2018-04-06	0.150471
Helicobacter pylori	43225	0.150471
Helicobacter pylori	43226	0.150471
Helicobacter pylori	43257	0.150471
Helicobacter pylori	43287	0.150471
Helicobacter pylori	2018-08-06	0.150471
Helicobacter pylori	43348	0.150471
Helicobacter pylori	2018-12-05	0.150471
Helicobacter pylori	43504	0.150439
Helicobacter pylori	10593a/2	0.150537
Helicobacter pylori	10K	0.150416
Helicobacter pylori	10Kb	0.150416
Helicobacter pylori	17C7	0.150416
Helicobacter pylori	18C7	0.150416
Helicobacter pylori	18K7	0.150416
Helicobacter pylori	1C1	0.150416
Helicobacter pylori	2Ca	0.150416
Helicobacter pylori	328 KM	0.150416
Helicobacter pylori	3Cb	0.150416
Helicobacter pylori	4Cb	0.150416
Helicobacter pylori	ARHp80	0.150423
Helicobacter pylori	ATCC11637	0.150471
Helicobacter pylori	ATCC43504	0.150417
Helicobacter pylori	ATCC700392	0.15038
Helicobacter pylori	Ba142	0.150416
Helicobacter pylori	CAS 015 J0	0.150537
Helicobacter pylori	CAS 015 J56	0.150537
Helicobacter pylori	CCUG17874	0.150416
Helicobacter pylori	G104	0.150416
Helicobacter pylori	G12	0.150416
Helicobacter pylori	G20	0.150416
Helicobacter pylori	G204	0.150416
Helicobacter pylori	G21b	0.150416
Helicobacter pylori	G39	0.150416
Helicobacter pylori	G50	0.150416
Helicobacter pylori	HER 126 V1	0.150537
Helicobacter pylori	HER 126 V4	0.150537
Helicobacter pylori	Hp 26695	0.150442
Helicobacter pylori	isolate 1	0.150415
Helicobacter pylori	isolate 18	0.150415
Helicobacter pylori	isolate 20	0.150415
Helicobacter pylori	isolate 8	0.150415
Helicobacter pylori	J99	0.150406
Helicobacter pylori	L1675	0.150386
Helicobacter pylori	Ma01	0.150416
Helicobacter pylori	MD6	0.150416
Helicobacter pylori	MDO21	0.150416
Helicobacter pylori	n.d	0.150411
Helicobacter pylori	NS23	0.150416
Helicobacter pylori	PCM 2561 (ATCC8739, DSM 1576)	0.150416
Helicobacter pylori	PG139	0.150386
Helicobacter pylori	PG156	0.150386
Helicobacter pylori	PG233	0.150386
Helicobacter pylori	RIG 117 J0	0.150537
Helicobacter pylori	RIG 117 J56	0.150537
Helicobacter pylori	S1900	0.150434
Helicobacter pylori	SI10	0.150416
Helicobacter pylori	SS1	0.150403
Helicobacter pylori	strain 1	0.150396
Helicobacter pylori	strain 2	0.150396
Helicobacter pylori	strain 3	0.150396
Helicobacter pylori	TF1	0.150434
Helicobacter pylori	TF2	0.150434
Helicobacter pylori	TF3	0.150434
Helicobacter pylori	TF4	0.150434
Helicobacter pylori	TS1776	0.150434
Helicobacter pylori	TS1900	0.150434
Helicobacter pylori	v1254	0.15044
Helicobacter pylori	v1354	0.150442
Helicobacter pylori	v633	0.150438
hemophilus influenzae a	n.d	0.150432
Mus musculus	n.d	0.150476
Mycobacterium bovis	AN5	0.150371
Mycobacterium bovis	ATCC25523	0.150449
Mycobacterium bovis	ATCC27289	0.150507
Mycobacterium bovis	ATCC35720	0.150507
Mycobacterium bovis	BCG / Pasteur	0.15041
Mycobacterium bovis	BCG Tokyo	0.150349
Mycobacterium bovis	BCG-Connaught	0.150527
Mycobacterium bovis	BCG-Denmark	0.150495
Mycobacterium bovis	BCG-Glaxo	0.150495
Mycobacterium bovis	BCG-japan	0.150513
Mycobacterium bovis	BCG-Moreau	0.150444
Mycobacterium bovis	BCG-Pasteur	0.150437
Mycobacterium bovis	BCG-Russia	0.150464
Mycobacterium bovis	n.d	0.150413
Mycobacterium bovis	NCTC 10772	0.150394
Mycobacterium bovis BCG	ATCC35734	0.150379
Mycobacterium bovis BCG	ATCC35743	0.150411
Mycobacterium bovis BCG	BCG	0.150389
Mycobacterium bovis BCG	KOP55	0.150398
Mycobacterium bovis BCG	ML1006	0.150504
Mycobacterium bovis BCG	ML1007	0.150504
Mycobacterium bovis BCG	ML1009	0.150504
Mycobacterium bovis BCG	ML1010	0.150504
Mycobacterium bovis BCG	ML1012	0.150504
Mycobacterium bovis BCG	ML1013	0.150504
Mycobacterium bovis BCG	ML1025	0.150504
Mycobacterium bovis BCG	ML1029	0.150504
Mycobacterium bovis BCG	ML1030	0.150504
Mycobacterium bovis BCG	ML1034	0.15056
Mycobacterium bovis BCG	ML1036	0.150504
Mycobacterium bovis BCG	ML1037	0.150504
Mycobacterium bovis BCG	ML1038	0.150504
Mycobacterium bovis BCG	ML1040	0.150504
Mycobacterium bovis BCG	ML1041	0.150504
Mycobacterium bovis BCG	ML1042	0.150504
Mycobacterium bovis BCG	ML1044	0.150504
Mycobacterium bovis BCG	ML1046	0.150504
Mycobacterium bovis BCG	ML1047	0.150504
Mycobacterium bovis BCG	ML1048	0.150504
Mycobacterium bovis BCG	ML1050	0.150504
Mycobacterium bovis BCG	ML1051	0.150504
Mycobacterium bovis BCG	ML1052	0.150504
Mycobacterium bovis BCG	ML1053	0.150504
Mycobacterium bovis BCG	ML1058	0.150504
Mycobacterium bovis BCG	ML1060	0.150504
Mycobacterium bovis BCG	ML1061	0.150504
Mycobacterium bovis BCG	ML1062	0.150504
Mycobacterium bovis BCG	ML1064	0.150504
Mycobacterium bovis BCG	ML1065	0.150504
Mycobacterium bovis BCG	ML1069	0.150504
Mycobacterium bovis BCG	ML1075	0.150504
Mycobacterium bovis BCG	n.d	0.150461
Mycobacterium bovis BCG	P55	0.150507
Mycobacterium bovis BCG	Pasteur	0.150381
Mycobacterium bovis BCG	Pasteur ATCC35734	0.150322
Mycobacterium bovis BCG	TMC1011 Pasteur ATCC35734	0.150514
Mycobacterium bovis BCG	Tokyo	0.150402
Mycobacterium leprae	n.d	0.150443
Mycobacterium tuberculosis	0.026	0.150382
Mycobacterium tuberculosis	0.117	0.150394
Mycobacterium tuberculosis	0.178	0.150382
Mycobacterium tuberculosis	0.181	0.150382
Mycobacterium tuberculosis	1.819	0.150382
Mycobacterium tuberculosis	3.682	0.150357
Mycobacterium tuberculosis	3.761	0.150338
Mycobacterium tuberculosis	4.311	0.150435
Mycobacterium tuberculosis	4.708	0.150429
Mycobacterium tuberculosis	4.71	0.150322
Mycobacterium tuberculosis	43	0.150449
Mycobacterium tuberculosis	75.071	0.150386
Mycobacterium tuberculosis	137.5	0.150386
Mycobacterium tuberculosis	335.6	0.150251
Mycobacterium tuberculosis	1041.5	0.150386
Mycobacterium tuberculosis	6133	0.150447
Mycobacterium tuberculosis	9710	0.150431
Mycobacterium tuberculosis	11277	0.150454
Mycobacterium tuberculosis	12119	0.150484
Mycobacterium tuberculosis	17003	0.150484
Mycobacterium tuberculosis	19000	0.150484
Mycobacterium tuberculosis	27426	0.150449
Mycobacterium tuberculosis	103471	0.150361
Mycobacterium tuberculosis	120532	0.150449
Mycobacterium tuberculosis	136570	0.150484
Mycobacterium tuberculosis	182289	0.150449
Mycobacterium tuberculosis	260785	0.150449
Mycobacterium tuberculosis	341139	0.150449
Mycobacterium tuberculosis	377694	0.150449
Mycobacterium tuberculosis	912253	0.150484
Mycobacterium tuberculosis	3688023	0.150555
Mycobacterium tuberculosis	37892293	0.150555
Mycobacterium tuberculosis	00-0715	0.150449
Mycobacterium tuberculosis	01-0172	0.150449
Mycobacterium tuberculosis	01-0930	0.150449
Mycobacterium tuberculosis	01-1647	0.150449
Mycobacterium tuberculosis	02-0319	0.150449
Mycobacterium tuberculosis	02-1234	0.150449
Mycobacterium tuberculosis	03-0738	0.150449
Mycobacterium tuberculosis	04-0519	0.150449
Mycobacterium tuberculosis	04-0649	0.150449
Mycobacterium tuberculosis	08-0744	0.150449
Mycobacterium tuberculosis	08-0745	0.150449
Mycobacterium tuberculosis	08-0746	0.150449
Mycobacterium tuberculosis	08-0757	0.150449
Mycobacterium tuberculosis	08-0762	0.150449
Mycobacterium tuberculosis	08-0764	0.150449
Mycobacterium tuberculosis	08-0769	0.150449
Mycobacterium tuberculosis	08-0771	0.150449
Mycobacterium tuberculosis	08-0773	0.150449
Mycobacterium tuberculosis	08-0774	0.150449
Mycobacterium tuberculosis	08-0777	0.150449
Mycobacterium tuberculosis	08-0779	0.150449
Mycobacterium tuberculosis	08-0781	0.150449
Mycobacterium tuberculosis	08-0782	0.150449
Mycobacterium tuberculosis	08-0785	0.150449
Mycobacterium tuberculosis	08-0787	0.150449
Mycobacterium tuberculosis	08-0789	0.150449
Mycobacterium tuberculosis	08-0790	0.150449
Mycobacterium tuberculosis	08-0791	0.150449
Mycobacterium tuberculosis	08-0794	0.150449
Mycobacterium tuberculosis	08-0797	0.150449
Mycobacterium tuberculosis	08-0810	0.150449
Mycobacterium tuberculosis	08-0815	0.150413
Mycobacterium tuberculosis	08-0821	0.150449
Mycobacterium tuberculosis	1024_1	0.1504
Mycobacterium tuberculosis	1024_16.5	0.150387
Mycobacterium tuberculosis	1024_16.6	0.150387
Mycobacterium tuberculosis	1024_18	0.150393
Mycobacterium tuberculosis	1024_8.12	0.150387
Mycobacterium tuberculosis	115R	0.150446
Mycobacterium tuberculosis	124R	0.150446
Mycobacterium tuberculosis	1510-08	0.150288
Mycobacterium tuberculosis	1567-05	0.150288
Mycobacterium tuberculosis	16C10	0.150525
Mycobacterium tuberculosis	16C11	0.150525
Mycobacterium tuberculosis	16C12	0.150525
Mycobacterium tuberculosis	16C14	0.150525
Mycobacterium tuberculosis	16C15	0.150525
Mycobacterium tuberculosis	16C16	0.150525
Mycobacterium tuberculosis	16C6	0.150525
Mycobacterium tuberculosis	16C7	0.150525
Mycobacterium tuberculosis	16C9	0.150525
Mycobacterium tuberculosis	1896HF	0.15035
Mycobacterium tuberculosis	18b	0.150413
Mycobacterium tuberculosis	32C1	0.150525
Mycobacterium tuberculosis	32C2	0.150525
Mycobacterium tuberculosis	32C3	0.150525
Mycobacterium tuberculosis	32C4	0.150525
Mycobacterium tuberculosis	32C5	0.150525
Mycobacterium tuberculosis	8C1	0.150525
Mycobacterium tuberculosis	8C2	0.150525
Mycobacterium tuberculosis	8C3	0.150525
Mycobacterium tuberculosis	8C5	0.150525
Mycobacterium tuberculosis	8C6	0.150525
Mycobacterium tuberculosis	8C7	0.150525
Mycobacterium tuberculosis	90-221387	0.150376
Mycobacterium tuberculosis	99-1914	0.150449
Mycobacterium tuberculosis	A8	0.150352
Mycobacterium tuberculosis	A8 241	0.15044
Mycobacterium tuberculosis	AH9584	0.150448
Mycobacterium tuberculosis	ANS1	0.150396
Mycobacterium tuberculosis	ATCC14468	0.15044
Mycobacterium tuberculosis	ATCC25177	0.150572
Mycobacterium tuberculosis	ATCC27294	0.150374
Mycobacterium tuberculosis	ATCC35338	0.150349
Mycobacterium tuberculosis	ATCC35801	0.150358
Mycobacterium tuberculosis	ATCC35802	0.150507
Mycobacterium tuberculosis	ATCC35818	0.150558
Mycobacterium tuberculosis	ATCC35820	0.150504
Mycobacterium tuberculosis	ATCC35821	0.150492
Mycobacterium tuberculosis	ATCC35822	0.1504
Mycobacterium tuberculosis	ATCC35826	0.150513
Mycobacterium tuberculosis	ATCC35827	0.150504
Mycobacterium tuberculosis	ATCC35830	0.150492
Mycobacterium tuberculosis	ATCC35837	0.150492
Mycobacterium tuberculosis	ATCC35838	0.150467
Mycobacterium tuberculosis	ATCC49532	0.150432
Mycobacterium tuberculosis	ATCC9360	0.150492
Mycobacterium tuberculosis	ATCC25618	0.150381
Mycobacterium tuberculosis	ATCC35811	0.150381
Mycobacterium tuberculosis	B51	0.150525
Mycobacterium tuberculosis	B52	0.150525
Mycobacterium tuberculosis	B5200	0.150525
Mycobacterium tuberculosis	B5201	0.150525
Mycobacterium tuberculosis	B5202	0.150525
Mycobacterium tuberculosis	B53	0.150525
Mycobacterium tuberculosis	B54	0.150525
Mycobacterium tuberculosis	B5400	0.150525
Mycobacterium tuberculosis	B5401	0.150525
Mycobacterium tuberculosis	B5402	0.150525
Mycobacterium tuberculosis	B55	0.150525
Mycobacterium tuberculosis	B56	0.150525
Mycobacterium tuberculosis	B59	0.150525
Mycobacterium tuberculosis	B64	0.150525
Mycobacterium tuberculosis	B68	0.150525
Mycobacterium tuberculosis	B70	0.150525
Mycobacterium tuberculosis	B71	0.150525
Mycobacterium tuberculosis	B74	0.150525
Mycobacterium tuberculosis	B79	0.150525
Mycobacterium tuberculosis	B84	0.150525
Mycobacterium tuberculosis	B85	0.150525
Mycobacterium tuberculosis	B92	0.150525
Mycobacterium tuberculosis	B95	0.150525
Mycobacterium tuberculosis	B96	0.150525
Mycobacterium tuberculosis	B97	0.150525
Mycobacterium tuberculosis	B99	0.150525
Mycobacterium tuberculosis	BAS10	0.150525
Mycobacterium tuberculosis	BAS5	0.150525
Mycobacterium tuberculosis	BAS6	0.150525
Mycobacterium tuberculosis	BAS7	0.150525
Mycobacterium tuberculosis	BAS8	0.150525
Mycobacterium tuberculosis	BCG	0.150496
Mycobacterium tuberculosis	BCG(SI)	0.150591
Mycobacterium tuberculosis	BE11677	0.150448
Mycobacterium tuberculosis	Beijing	0.150389
Mycobacterium tuberculosis	Beijing (E-47/94)	0.150446
Mycobacterium tuberculosis	Beijing 17919	0.15043
Mycobacterium tuberculosis	Beijing 1934/03	0.150493
Mycobacterium tuberculosis	Beijing F2	0.150414
Mycobacterium tuberculosis	BioA-UE	0.150459
Mycobacterium tuberculosis	BSG001	0.150406
Mycobacterium tuberculosis	C110/09	0.150375
Mycobacterium tuberculosis	CGMCC 1.88	0.150288
Mycobacterium tuberculosis	CIB99	0.150318
Mycobacterium tuberculosis	CIBIN/UMF15:99 isolate	0.150449
Mycobacterium tuberculosis	CIP 103471	0.150347
Mycobacterium tuberculosis	clinical isolate 1	0.150395
Mycobacterium tuberculosis	clinical isolate 2	0.150395
Mycobacterium tuberculosis	clinical isolate X001354	0.150546
Mycobacterium tuberculosis	clinical isolate X003899	0.150546
Mycobacterium tuberculosis	clinical isolate X004244	0.150546
Mycobacterium tuberculosis	clinical isolate X004439	0.150546
Mycobacterium tuberculosis	clinical isolate X005282	0.150546
Mycobacterium tuberculosis	clinical isolate X005319	0.150546
Mycobacterium tuberculosis	clone 4.1	0.15041
Mycobacterium tuberculosis	clone 8.1	0.150396
Mycobacterium tuberculosis	clone 8.2	0.150382
Mycobacterium tuberculosis	clone 8.3	0.150382
Mycobacterium tuberculosis	CN-40	0.150461
Mycobacterium tuberculosis	CNCTC My 331/88	0.150373
Mycobacterium tuberculosis	CNTC My 331/88 ATCC27294	0.150442
Mycobacterium tuberculosis	CSU 45 SRI 1377	0.150785
Mycobacterium tuberculosis	CSU93	0.150436
Mycobacterium tuberculosis	D-211	0.150484
Mycobacterium tuberculosis	deltacydKO mutant	0.150438
Mycobacterium tuberculosis	deltacydKO/A317T mutant	0.150438
Mycobacterium tuberculosis	DKU211	0.150381
Mycobacterium tuberculosis	DKU220	0.150381
Mycobacterium tuberculosis	DKU76	0.150381
Mycobacterium tuberculosis	DKU97A	0.150381
Mycobacterium tuberculosis	E350	0.150583
Mycobacterium tuberculosis	E412	0.150288
Mycobacterium tuberculosis	E8133	0.150448
Mycobacterium tuberculosis	Erdman	0.150433
Mycobacterium tuberculosis	Erdman ATCC35801	0.150411
Mycobacterium tuberculosis	FJ05120	0.150383
Mycobacterium tuberculosis	FJ05195	0.150383
Mycobacterium tuberculosis	H160	0.15031
Mycobacterium tuberculosis	H190	0.15031
Mycobacterium tuberculosis	H242	0.150186
Mycobacterium tuberculosis	H37	0.150423
Mycobacterium tuberculosis	H37 Rv	0.150292
Mycobacterium tuberculosis	H37Pv	0.150372
Mycobacterium tuberculosis	H37Ra	0.150456
Mycobacterium tuberculosis	H37Rv	0.150394
Mycobacterium tuberculosis	H37Rv-CV-Lux AB	0.150387
Mycobacterium tuberculosis	H3Rv	0.150452
Mycobacterium tuberculosis	H4	0.150384
Mycobacterium tuberculosis	Haarlem 9532/03	0.150493
Mycobacterium tuberculosis	Harlingen	0.150385
Mycobacterium tuberculosis	IC1	0.150413
Mycobacterium tuberculosis	IC2	0.150413
Mycobacterium tuberculosis	IC3	0.150413
Mycobacterium tuberculosis	IMCJ946.K2	0.150343
Mycobacterium tuberculosis	isolate 02TBDM039EP097	0.15041
Mycobacterium tuberculosis	isolate 040	0.150293
Mycobacterium tuberculosis	isolate 1	0.150387
Mycobacterium tuberculosis	isolate 10	0.150473
Mycobacterium tuberculosis	isolate 11	0.150473
Mycobacterium tuberculosis	isolate 12	0.150473
Mycobacterium tuberculosis	isolate 12119	0.15042
Mycobacterium tuberculosis	isolate 1237	0.150419
Mycobacterium tuberculosis	isolate 1256	0.150419
Mycobacterium tuberculosis	isolate 1259	0.150419
Mycobacterium tuberculosis	isolate 1288	0.150419
Mycobacterium tuberculosis	isolate 13	0.150473
Mycobacterium tuberculosis	isolate 14	0.150473
Mycobacterium tuberculosis	isolate 15	0.150473
Mycobacterium tuberculosis	isolate 16	0.150473
Mycobacterium tuberculosis	isolate 164	0.150327
Mycobacterium tuberculosis	isolate 17	0.150473
Mycobacterium tuberculosis	isolate 17003	0.15042
Mycobacterium tuberculosis	isolate 18	0.150473
Mycobacterium tuberculosis	isolate 19	0.150473
Mycobacterium tuberculosis	isolate 19000	0.15042
Mycobacterium tuberculosis	isolate 2	0.150396
Mycobacterium tuberculosis	isolate 20	0.150473
Mycobacterium tuberculosis	isolate 2092/05	0.150333
Mycobacterium tuberculosis	isolate 210	0.150473
Mycobacterium tuberculosis	isolate 2199	0.150473
Mycobacterium tuberculosis	isolate 2301	0.150558
Mycobacterium tuberculosis	isolate 235	0.150583
Mycobacterium tuberculosis	isolate 2474	0.150558
Mycobacterium tuberculosis	isolate 25618	0.15042
Mycobacterium tuberculosis	isolate 29/10	0.150335
Mycobacterium tuberculosis	isolate 2911	0.150558
Mycobacterium tuberculosis	isolate 3	0.150413
Mycobacterium tuberculosis	isolate 30167	0.150473
Mycobacterium tuberculosis	isolate 307	0.150367
Mycobacterium tuberculosis	isolate 308	0.150367
Mycobacterium tuberculosis	isolate 309	0.150367
Mycobacterium tuberculosis	isolate 311	0.150367
Mycobacterium tuberculosis	isolate 343	0.150367
Mycobacterium tuberculosis	isolate 344	0.150367
Mycobacterium tuberculosis	isolate 349	0.150367
Mycobacterium tuberculosis	isolate 352	0.150367
Mycobacterium tuberculosis	isolate 353	0.150367
Mycobacterium tuberculosis	isolate 35820	0.15042
Mycobacterium tuberculosis	isolate 35822	0.15042
Mycobacterium tuberculosis	isolate 359	0.150367
Mycobacterium tuberculosis	isolate 361	0.150367
Mycobacterium tuberculosis	isolate 363	0.150367
Mycobacterium tuberculosis	isolate 364	0.150367
Mycobacterium tuberculosis	isolate 4	0.150413
Mycobacterium tuberculosis	isolate 431	0.150337
Mycobacterium tuberculosis	isolate 439/11	0.150345
Mycobacterium tuberculosis	isolate 44	0.150327
Mycobacterium tuberculosis	isolate 5	0.150421
Mycobacterium tuberculosis	isolate 5041	0.150525
Mycobacterium tuberculosis	isolate 5310	0.150473
Mycobacterium tuberculosis	isolate 6	0.150421
Mycobacterium tuberculosis	isolate 625	0.150558
Mycobacterium tuberculosis	isolate 7	0.15047
Mycobacterium tuberculosis	isolate 7357/98	0.150333
Mycobacterium tuberculosis	isolate 741	0.150419
Mycobacterium tuberculosis	isolate 753	0.150419
Mycobacterium tuberculosis	isolate 756/10	0.150345
Mycobacterium tuberculosis	isolate 758	0.150419
Mycobacterium tuberculosis	isolate 760	0.150419
Mycobacterium tuberculosis	isolate 761	0.150558
Mycobacterium tuberculosis	isolate 778/10	0.150335
Mycobacterium tuberculosis	isolate 8	0.150473
Mycobacterium tuberculosis	isolate 80,014	0.150367
Mycobacterium tuberculosis	isolate 821	0.150419
Mycobacterium tuberculosis	isolate 83	0.150327
Mycobacterium tuberculosis	isolate 9	0.150508
Mycobacterium tuberculosis	isolate 917/10	0.150335
Mycobacterium tuberculosis	isolate 926	0.150329
Mycobacterium tuberculosis	isolate 930	0.150419
Mycobacterium tuberculosis	isolate 9449/06	0.150333
Mycobacterium tuberculosis	isolate A	0.150449
Mycobacterium tuberculosis	isolate A-1-1	0.150565
Mycobacterium tuberculosis	isolate A-1-2	0.150565
Mycobacterium tuberculosis	isolate A-1-3	0.150565
Mycobacterium tuberculosis	isolate A-2-1	0.150565
Mycobacterium tuberculosis	isolate A-2-3	0.150565
Mycobacterium tuberculosis	isolate A-2-4	0.150565
Mycobacterium tuberculosis	isolate A-2-5	0.150565
Mycobacterium tuberculosis	isolate A2558	0.150525
Mycobacterium tuberculosis	isolate A-2-6	0.150565
Mycobacterium tuberculosis	isolate A-3-1	0.150565
Mycobacterium tuberculosis	isolate A-3-11	0.150565
Mycobacterium tuberculosis	isolate A-3-12	0.150565
Mycobacterium tuberculosis	isolate A-3-13	0.150565
Mycobacterium tuberculosis	isolate A-3-15	0.150565
Mycobacterium tuberculosis	isolate A-3-16	0.150565
Mycobacterium tuberculosis	isolate A-3-17	0.150565
Mycobacterium tuberculosis	isolate A-3-19	0.150565
Mycobacterium tuberculosis	isolate A-3-2	0.150565
Mycobacterium tuberculosis	isolate A-3-20	0.150565
Mycobacterium tuberculosis	isolate A-3-21	0.150565
Mycobacterium tuberculosis	isolate A-3-22	0.150565
Mycobacterium tuberculosis	isolate A-3-47	0.150565
Mycobacterium tuberculosis	isolate A-3-5	0.150565
Mycobacterium tuberculosis	isolate A-3-6	0.150565
Mycobacterium tuberculosis	isolate A-3-9	0.150565
Mycobacterium tuberculosis	isolate A-4-25	0.150565
Mycobacterium tuberculosis	isolate A-4-8	0.150565
Mycobacterium tuberculosis	isolate B	0.150449
Mycobacterium tuberculosis	isolate C	0.150449
Mycobacterium tuberculosis	isolate CAN-ICU 61714	0.150288
Mycobacterium tuberculosis	isolate CIBIN/UMF 15:19	0.150381
Mycobacterium tuberculosis	isolate D	0.150449
Mycobacterium tuberculosis	isolate E	0.150449
Mycobacterium tuberculosis	isolate F	0.150449
Mycobacterium tuberculosis	isolate G	0.150449
Mycobacterium tuberculosis	isolate H	0.150449
Mycobacterium tuberculosis	isolate I	0.150449
Mycobacterium tuberculosis	isolate J	0.150449
Mycobacterium tuberculosis	isolate J-1-19	0.150565
Mycobacterium tuberculosis	isolate K-3-6	0.150565
Mycobacterium tuberculosis	isolate M-1-32	0.150565
Mycobacterium tuberculosis	isolate MA03	0.150367
Mycobacterium tuberculosis	isolate MDR1	0.150335
Mycobacterium tuberculosis	isolate MDR2	0.150335
Mycobacterium tuberculosis	isolate Mt103	0.150302
Mycobacterium tuberculosis	isolate N-4-11	0.150565
Mycobacterium tuberculosis	isolate N-5-2	0.150565
Mycobacterium tuberculosis	isolate NJT210	0.150473
Mycobacterium tuberculosis	isolate NJT210EMB-R-C1	0.150473
Mycobacterium tuberculosis	isolate NJT210EMB-R-C2	0.150473
Mycobacterium tuberculosis	isolate NJT210EMB-R-C3	0.150473
Mycobacterium tuberculosis	isolate NJT30167	0.150473
Mycobacterium tuberculosis	isolate NJT5310	0.150473
Mycobacterium tuberculosis	isolate no. 246	0.150508
Mycobacterium tuberculosis	isolate P-1-50	0.150565
Mycobacterium tuberculosis	isolate P-4-11	0.150565
Mycobacterium tuberculosis	isolate Paebeta-19	0.150312
Mycobacterium tuberculosis	isolate Praha 1	0.150333
Mycobacterium tuberculosis	isolate Praha 128	0.150333
Mycobacterium tuberculosis	isolate Q-4-1	0.150565
Mycobacterium tuberculosis	isolate R-1-38	0.150565
Mycobacterium tuberculosis	isolate Spec. 192	0.150405
Mycobacterium tuberculosis	isolate Spec. 210	0.150405
Mycobacterium tuberculosis	isolate T113	0.150309
Mycobacterium tuberculosis	isolate U-2-15	0.150565
Mycobacterium tuberculosis	isolate U-4-6	0.150565
Mycobacterium tuberculosis	isolate UC0801	0.150458
Mycobacterium tuberculosis	isolate UC0802	0.150458
Mycobacterium tuberculosis	isolate UC0803	0.150458
Mycobacterium tuberculosis	isolate UC0804	0.150458
Mycobacterium tuberculosis	isolate Z-1-4	0.150565
Mycobacterium tuberculosis	JAL	0.150381
Mycobacterium tuberculosis	Kurono	0.150387
Mycobacterium tuberculosis	KZN494	0.15038
Mycobacterium tuberculosis	LAM 7968/03	0.150493
Mycobacterium tuberculosis	LAM 8885/05	0.150493
Mycobacterium tuberculosis	LAM1	0.150343
Mycobacterium tuberculosis	LAM-1	0.150366
Mycobacterium tuberculosis	LCB0005	0.150288
Mycobacterium tuberculosis	LV19	0.150381
Mycobacterium tuberculosis	LV2	0.150381
Mycobacterium tuberculosis	LV54	0.150381
Mycobacterium tuberculosis	M11	0.15033
Mycobacterium tuberculosis	M16	0.15033
Mycobacterium tuberculosis	M21	0.15033
Mycobacterium tuberculosis	M22	0.15033
Mycobacterium tuberculosis	M27	0.15033
Mycobacterium tuberculosis	M3	0.15033
Mycobacterium tuberculosis	M4	0.15033
Mycobacterium tuberculosis	M45	0.150288
Mycobacterium tuberculosis	M46	0.15033
Mycobacterium tuberculosis	M48	0.15033
Mycobacterium tuberculosis	M5	0.15033
Mycobacterium tuberculosis	M53	0.15033
Mycobacterium tuberculosis	M6	0.15033
Mycobacterium tuberculosis	M8	0.15033
Mycobacterium tuberculosis	MC2	0.150471
Mycobacterium tuberculosis	mc2 6020	0.150295
Mycobacterium tuberculosis	MC2 6220	0.150368
Mycobacterium tuberculosis	mc'2-7000x	0.150323
Mycobacterium tuberculosis	MDR1	0.150591
Mycobacterium tuberculosis	MDR2	0.150591
Mycobacterium tuberculosis	MDR3	0.150591
Mycobacterium tuberculosis	MDR4	0.150591
Mycobacterium tuberculosis	MDR5	0.150591
Mycobacterium tuberculosis	MDR6	0.150591
Mycobacterium tuberculosis	MDR7	0.150591
Mycobacterium tuberculosis	MDR8	0.150591
Mycobacterium tuberculosis	MS-115	0.150444
Mycobacterium tuberculosis	MSC01400	0.15043
Mycobacterium tuberculosis	Mt103	0.150472
Mycobacterium tuberculosis	MT1K	0.150359
Mycobacterium tuberculosis	MTB2556	0.15035
Mycobacterium tuberculosis	MTB4000	0.15035
Mycobacterium tuberculosis	MTB411	0.15035
Mycobacterium tuberculosis	MTB985	0.15035
Mycobacterium tuberculosis	MTCC 300	0.150284
Mycobacterium tuberculosis	My 331/88	0.150391
Mycobacterium tuberculosis	MYC5165	0.150433
Mycobacterium tuberculosis	n.d	0.150404
Mycobacterium tuberculosis	NHN382	0.150381
Mycobacterium tuberculosis	NJT210CGG	0.150473
Mycobacterium tuberculosis	NJT210CGG-CAG	0.150473
Mycobacterium tuberculosis	NJT210GAC	0.150473
Mycobacterium tuberculosis	NJT210GCC	0.150473
Mycobacterium tuberculosis	NJT210TCC	0.150473
Mycobacterium tuberculosis	NJT210TGC	0.150473
Mycobacterium tuberculosis	PA-4624	0.150288
Mycobacterium tuberculosis	PE-003	0.150394
Mycobacterium tuberculosis	Praha 1	0.150393
Mycobacterium tuberculosis	Praha 131	0.150402
Mycobacterium tuberculosis	Praha 4	0.1504
Mycobacterium tuberculosis	pSMT1	0.150434
Mycobacterium tuberculosis	R506	0.150373
Mycobacterium tuberculosis	RS-032	0.150394
Mycobacterium tuberculosis	RS-036	0.150394
Mycobacterium tuberculosis	Rv10	0.150525
Mycobacterium tuberculosis	Rv11	0.150525
Mycobacterium tuberculosis	Rv17	0.150525
Mycobacterium tuberculosis	Rv18	0.150525
Mycobacterium tuberculosis	Rv21	0.150525
Mycobacterium tuberculosis	Rv23	0.150525
Mycobacterium tuberculosis	Rv31	0.150525
Mycobacterium tuberculosis	Rv39	0.150525
Mycobacterium tuberculosis	Rv44	0.150525
Mycobacterium tuberculosis	Rv4400	0.150525
Mycobacterium tuberculosis	Rv4401	0.150525
Mycobacterium tuberculosis	Rv4402	0.150525
Mycobacterium tuberculosis	Rv7	0.150525
Mycobacterium tuberculosis	Rv8	0.150525
Mycobacterium tuberculosis	Rv8100	0.150525
Mycobacterium tuberculosis	Rv8101	0.150525
Mycobacterium tuberculosis	Rv8102	0.150525
Mycobacterium tuberculosis	RvAS1	0.150525
Mycobacterium tuberculosis	RvAS2	0.150525
Mycobacterium tuberculosis	RvAS3	0.150525
Mycobacterium tuberculosis	RvAS4	0.150525
Mycobacterium tuberculosis	RvAS9	0.150525
Mycobacterium tuberculosis	SAWC 2371 Haarlem	0.150439
Mycobacterium tuberculosis	SAWC 3385 Cas1/Delhi	0.150439
Mycobacterium tuberculosis	SAWC 3906 Atyp-beijing	0.150439
Mycobacterium tuberculosis	SAWC 3933 LCC	0.150433
Mycobacterium tuberculosis	serotype 35B	0.150288
Mycobacterium tuberculosis	Spec. 192	0.150383
Mycobacterium tuberculosis	Spec. 210	0.150383
Mycobacterium tuberculosis	SRI 1367	0.150444
Mycobacterium tuberculosis	SRI 1369	0.150418
Mycobacterium tuberculosis	SRI 4000	0.150418
Mycobacterium tuberculosis	T1413	0.150482
Mycobacterium tuberculosis	T1538	0.150482
Mycobacterium tuberculosis	TB-1678/05	0.150432
Mycobacterium tuberculosis	TB-2506/06	0.150432
Mycobacterium tuberculosis	TF274	0.150373
Mycobacterium tuberculosis	TG2	0.150288
Mycobacterium tuberculosis	TN1008	0.150448
Mycobacterium tuberculosis	TN1037	0.150448
Mycobacterium tuberculosis	TN1040	0.150448
Mycobacterium tuberculosis	TN1051	0.150448
Mycobacterium tuberculosis	TN1082	0.150448
Mycobacterium tuberculosis	TN1195	0.15037
Mycobacterium tuberculosis	TN1314	0.15037
Mycobacterium tuberculosis	TN1618	0.15037
Mycobacterium tuberculosis	TN1811	0.15037
Mycobacterium tuberculosis	TN2351	0.150448
Mycobacterium tuberculosis	TN2524	0.150448
Mycobacterium tuberculosis	TN2557	0.15037
Mycobacterium tuberculosis	TN3183	0.150448
Mycobacterium tuberculosis	TN3979	0.150448
Mycobacterium tuberculosis	TN4259	0.150448
Mycobacterium tuberculosis	TN565	0.15037
Mycobacterium tuberculosis	TN576	0.15037
Mycobacterium tuberculosis	TN587	0.150381
Mycobacterium tuberculosis	TN675	0.150448
Mycobacterium tuberculosis	TN702	0.15037
Mycobacterium tuberculosis	TN715	0.15037
Mycobacterium tuberculosis	TN768	0.15037
Mycobacterium tuberculosis	TN772	0.15037
Mycobacterium tuberculosis	TN913	0.150448
Mycobacterium tuberculosis	TN994	0.150448
Mycobacterium tuberculosis	TNP090	0.150312
Mycobacterium tuberculosis	UAl3495	0.150314
[truncated: 2,295 more rows]

## Sheet: Coated New
Nc	COAT_KEY		cc1 = Coating mult.	cc2 = Poly.	Sh1(LOGP1c)	Sh2(PSA1c)	Sh3(AMRc)	Sh1(LOGP2c)	Sh2(PSA2c)	Sh3(AMR2c)	LOGP1	PSA1	AMR1	LOGP2	PSA2	AMR2
1	PDT/Mel	DoubleMonomer	Double	Monomer	0.147762	0.150498	0.149111	0.146268	0.150539	0.149265	77.82	0.517	40.804	116.73	-0.731	36.461
2	PDT/ACh	DoubleMonomer	Double	Monomer	0.147762	0.150498	0.149111	0.14962	0.150555	0.149202	77.82	0.517	40.804	26.3	-1.195	38.231
3	PDT/CQ	DoubleMonomer	Double	Monomer	0.147762	0.150498	0.149111	0.149555	0.15037	0.147057	77.82	0.517	40.804	28.16	4.346	96.42
4	PDT/DMB	DoubleMonomer	Double	Monomer	0.147762	0.150498	0.149111	0.147341	0.150489	0.149568	77.82	0.517	40.804	88.99	0.793	27.793
5	PDT/CPB	DoubleMonomer	Double	Monomer	0.147762	0.150498	0.149111	0.147005	0.150455	0.148693	77.82	0.517	40.804	97.78	1.805	52.479
6	PDT/G	DoubleMonomer	Double	Monomer	0.147762	0.150498	0.149111	0.147834	0.150514	0.150172	77.82	0.517	40.804	75.89	0.035	10.2
7	PDT	SingleMonomer	Single	Monomer	0.147762	0.150498	0.149111	0.150515	0.150515	0.150515	77.82	0.517	40.804	0	0	0
8	PVP	SinglePolymer	Single	Polymer	0.149827	0.150518	0.149462	0.150515	0.150515	0.150515	20.31	-0.081	30.846	0	0	0
9	Maltose	SingleMonomer	Single	Monomer	0.143279	0.15065	0.148119	0.150515	0.150515	0.150515	189.53	-4.058	68.191	0	0	0
10	Lactose	SingleMonomer	Single	Monomer	0.143279	0.15065	0.148119	0.150515	0.150515	0.150515	189.53	-4.058	68.191	0	0	0
11	Glutathione	SingleMonomer	Single	Monomer	0.14457	0.150579	0.148076	0.150515	0.150515	0.150515	158.82	-1.917	69.359	0	0	0
12	Glucose	SingleMonomer	Single	Monomer	0.146517	0.150592	0.149289	0.150515	0.150515	0.150515	110.38	-2.311	35.778	0	0	0
13	DMA	SingleMonomer	Single	Monomer	0.150515	0.150216	0.145975	0.150515	0.150515	0.150515	0	8.922	124.149	0	0	0
14	PGA	SinglePolymer	Single	Polymer	0.146896	0.150546	0.149444	0.150515	0.150515	0.150515	100.62	-0.924	31.362	0	0	0
15	Galactose	SingleMonomer	Single	Monomer	0.146517	0.150592	0.149289	0.150515	0.150515	0.150515	110.38	-2.311	35.778	0	0	0
16	None	NoneNone	None	None	0.150515	0.150515	0.150515	0.150515	0.150515	0.150515	0	0	0	0	0	0
					Sh1(LOGP1c)	Sh2(PSA1c)	DSh2(PSA1c)	Sh1(LOGP2c)	Sh2(PSA2c)	DSh2(PSA2c)		DSh2(PSA1c+PSA1c)
N1	TEG	SinglePolymer	Single	Polymer	0.150558	0.148459	-0.00207241	0.150515	0.150515	#REF!		#REF!	TEG	COATc		Coating Agent 01	Coating Agent 02
N2	PEG	SinglePolymer	Single	Polymer	0.150557	0.148793	-0.00173831	0.150515	0.150515	#REF!		#REF!	PEG	cc1 = Coating mult.	cc2 = Poly.	<Sh2(PSA1c)>	<Sh2(PSA2c)>
N3	TGA	SinglePolymer	Single	Polymer	0.150515	0.149235	-0.0012968	0.150515	0.150515	#REF!		#REF!	TGA	Double	Monomer	0.150498	0.150487
N4	PEG/Alg	DoublePolymer	Double	Polymer	0.150557	0.148793	-0.00173831	0.15065	0.143155	#REF!		#REF!	PEG/Alg	Single	Monomer	0.150539	0.150515
N5	Ch	SinglePolymer	Single	Polymer	0.151094	0.110733	-0.0397982	0.150515	0.150515	#REF!		#REF!	Ch	Single	Polymer	0.150532	0.150515
N6	PDA	SinglePolymer	Single	Polymer	0.150489	0.148183	-0.0023486	0.150515	0.150515	#REF!		#REF!		None	None	0.150515	0.150515
N7	PEG/Ch	DoublePolymer	Double	Polymer	0.150557	0.148793	-0.00173831		0.110733	-5.25023e-05		-0.00179081
N8	PVP	SinglePolymer	Single	Polymer	0.149827	0.150518	-1.40312e-05	0.150515	0.150515	-5.25023e-05		-6.65335e-05
N9
Coating							Coating agents	Symbol
Cmpd	SMILE (clean)	PSA	ALOGP	AMR			guanidine	G				800
PDT	SC1=NC(N)=CC(N)=N1	77.82	0.517	40.804			1,1-dimethylbiguanide	DMB
PVP	O=C1N(C=C)CCC1	20.31	-0.081	30.846			1-(3-chlorophenyl)biguanide	CPB
Maltose	O([C@H]1[C@H](O)[C@@H](O)C(O)O[C@@H]1CO)[C@H]2O[C@@H]([C@@H](O)[C@H](O)[C@H]2O)CO	189.53	-4.058	68.191			Chloroquine	CQ			Alginate, as an anionic copolyme
Lactose	C([C@@H]1[C@@H]([C@@H]([C@H]([C@@H](O1)O[C@@H]2[C@H](O[C@H]([C@@H]([C@H]2O)O)O)CO)O)O)O)O	189.53	-4.058	68.191			Acetylcholine	Ach
Glutathione	C(CC(=O)N[C@@H](CS)C(=O)NCC(=O)O)[C@@H](C(=O)O)N	158.82	-1.917	69.359			Melamine	Mel
Glucose	OC[C@H]1OC(O)[C@H](O)[C@@H](O)[C@@H]1O	110.38	-2.311	35.778			Polyvinylpyrrolidone	PVP
DMA	CCCCCCCCCCCC[N+](C)(C)CCCCCCCCCCCC	0	8.922	124.149			4,6-diamino-2-pyrimidinethiol	PDT
PGA	C(CC(=O)O)C(C(=O)O)N	100.62	-0.924	31.362			Didodecyldimethylammonium bromide	DMA
Galactose	O[C@H]1[C@@H](O)[C@H](O[C@H](O)[C@@H]1O)CO	110.38	-2.311	35.778			Poly(γ -glutamic acid)	PGA
Mel	c1(nc(nc(n1)N)N)N	116.73	-0.731	36.461			triethylene Glicol	TEG
Ach	CC(=O)OCC[N+](C)(C)C	26.3	-1.195	38.231			polyethylene glycol	PEG
CQ	Clc1cc2nccc(c2cc1)NC(C)CCCN(CC)CC	28.16	4.346	96.42			quaternized chitosan (QCS)	Ch
DMB	CN(C(NC(N)=N)=N)C	88.99	0.793	27.793			terminal carboxyl of Thioglycolic acid	TGA
CPB	N=C(NC(N)=N)NC1=CC(Cl)=CC=C1	97.78	1.805	52.479			PEG alginate. mannuronic and guluronic acids	PEG-Alg
G	NC(N)=N	75.89	0.035	10.2	TPSA (Dragon)	ALOGP (Dragon)	polydopamine	PDA
TEG	C(COCCOCCO)O	58.92	-1.3		58.920	-1.159
PEG	C(COCCO)O	49.69	-1.26		49.690	-1.028
TGA	C(C(=O)O)S	37.3	0		37.300	0.283
Alg	C1(C(C(OC(C1OC2C(C(C(C(O2)C(=O)O)P)O)O)C(=O)O)OP)O)O	192.44	-4.08		192.440	-2.820
Ch	COC(=O)NC1C(C(C(OC1OC2C(OC(C(C2O)N)OC3C(OC(C(C3O)N)O)CO)CO)CO)OC4C(C(C(C(O4)CO)OC5C(C(C(C(O5)CO)OC6C(C(C(C(O6)CO)OC7C(C(C(C(O7)CO)OC8C(C(C(C(O8)CO)OC9C(C(C(C(O9)CO)O)O)N)O)N)O)N)O)N)O)N)O)N)O	808	-17.62		808	-18.228
PDA	C1=CC(=C(C=C1CCN)O)O	66.46	0.78		66.480	-0.611

## Sheet: bacteria
cd1,cd2	<Sh1(ALOGPi)>
S. aureus
Multidrug-Resistant Pseudomonas aeruginosa	0.150429
Multidrug-Resistant Pseudomonas aeruginosa	0.150429
Multidrug-Resistant Pseudomonas aeruginosa	0.150429
Multidrug-Resistant Pseudomonas aeruginosa	0.150429
Multidrug-Resistant Pseudomonas aeruginosa	0.150429
Multidrug-Resistant Pseudomonas aeruginosa	0.150429
P. aeruginosa (ATCCi27853)	0.150512
methicillin-resistant Staphylococcus aureus (MRSA)
E. faecium
E.coli	0.150343
Staphylococcus aureus
Enterococcus faecalis (VRE)	0.150359
Staphylococcus epidermidis (MRSE)
S.aureus
E. coli K12 ATCC 29425	0.150438
E. coli ST648	0.150522
S. aureus ATCC 25923
S. aureus ST398
E. coli K12 ATCC 29425(S)	0.150532
E. coli ST648 (R)	0.150522
S. aureus ATCC 25923(S)
S. aureus ST398
Staphylococcus epidermitis (ATCC 12228)
Staphylococcus aureus (ATCC 25923)
Bassilus subtilis (ATCC 1720)	0.150416
Methicillin-Resistant Staphylococcus Aureus (ATCC 33591)
Escherichia coli (ATCC 1399)	0.150615
Pseudomonas aeroginos (ATCC 1430)	0.15027
A. baumannii (aba1604)
A. baumannii (aba1604)
A. baumannii (aba1604)
Escherichia coli DH5α	0.150511
Salmonella enterica serovar Typhimurium ATCC SC14028	0.150515
S. aureus
Escherichia coli DH5α	0.150511
Salmonella enterica serovar Typhimurium ATCC SC14028	0.150515
S. aureus
